# Supplementary material
Source: PubMed Central journal article supplement (PMC2556018)
Supplement: M800109-MCP200_1.pdf [file M800109-MCP200_1.pdf]

Supplemental Fig. S1 illustrates MALDI-TOF-TOF MS/MS spectra of ions from the changed proteins that are listed in Table 1, and the detailed information of mascot search results.

1 OAT\_MOUSE

MS/MS Fragmentation of **YGAHNYHPLVALER**

Found in **P29758**, OAT\_MOUSE Ornithine aminotransferase, mitochondrial precursor - Mus musculus (Mouse)

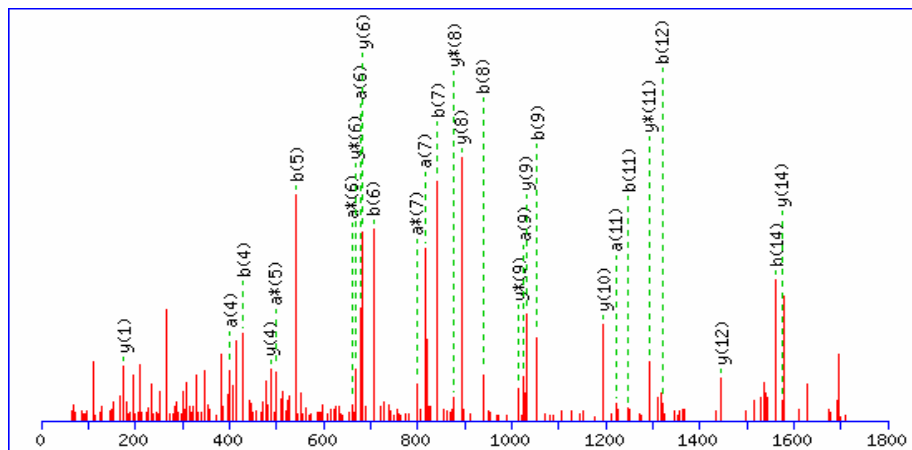

**Monoisotopic mass of neutral peptide Mr(calc):** 1735.88

**Fixed modifications:** Carbamidomethyl (C)

**Ions Score:** 41

**Matches (Bold Red):** 29/76 fragment ions using 69 most intense peaks

MS/MS Fragmentation of **IVFADGNFWGR**

Found in **P29758**, OAT\_MOUSE Ornithine aminotransferase, mitochondrial precursor - Mus musculus (Mouse)

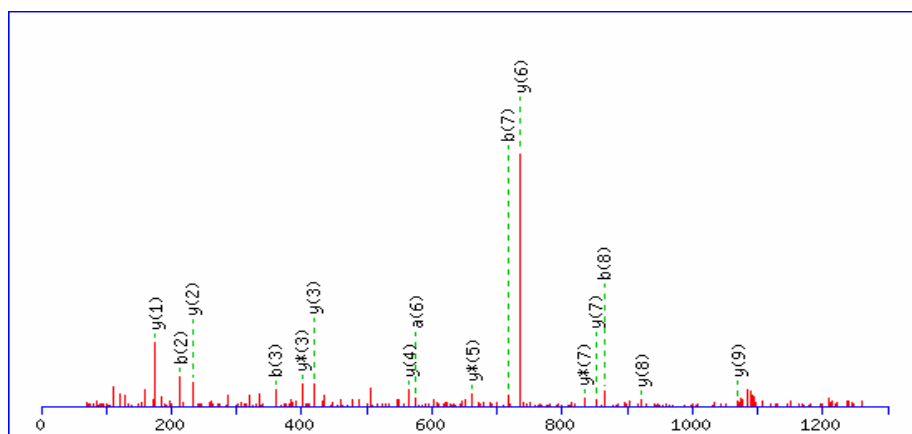

**Monoisotopic mass of neutral peptide Mr(calc):** 1280.63

**Fixed modifications:** Carbamidomethyl (C)

**Ions Score:** 42

**Matches (Bold Red):** 16/48 fragment ions using 40 most intense peaks

MS/MS Fragmentation of **HQVLFIADEIQTGLAR**

Found in **P29758**, OAT\_MOUSE Ornithine aminotransferase, mitochondrial precursor - Mus musculus (Mouse)

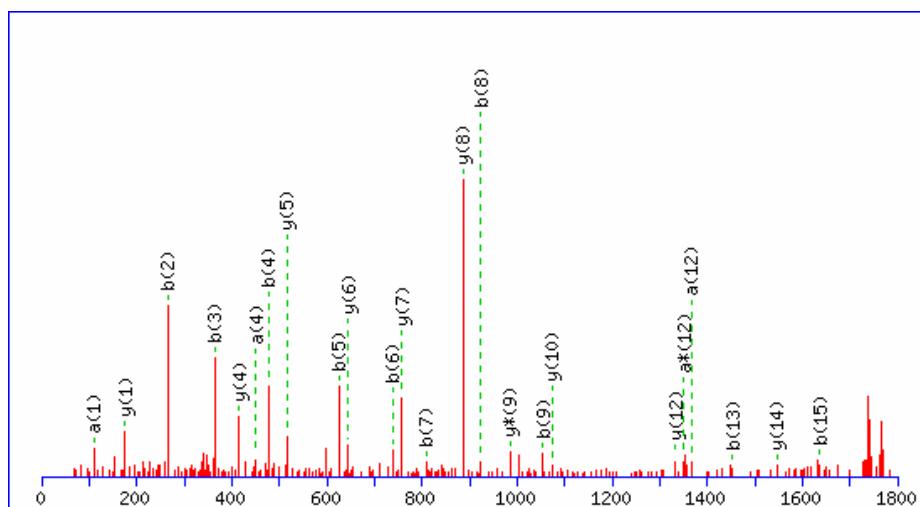

**Monoisotopic mass of neutral peptide Mr(calc): 1809.97**

**Fixed modifications:** Carbamidomethyl (C)

**Ions Score:** 73

**Matches (Bold Red):** 24/88 fragment ions using 42 most intense peaks

MS/MS Fragmentation of **WLAVDHENVRPDMVLLGK**

Found in **P29758**, OAT\_MOUSE Ornithine aminotransferase, mitochondrial precursor - Mus musculus (Mouse)

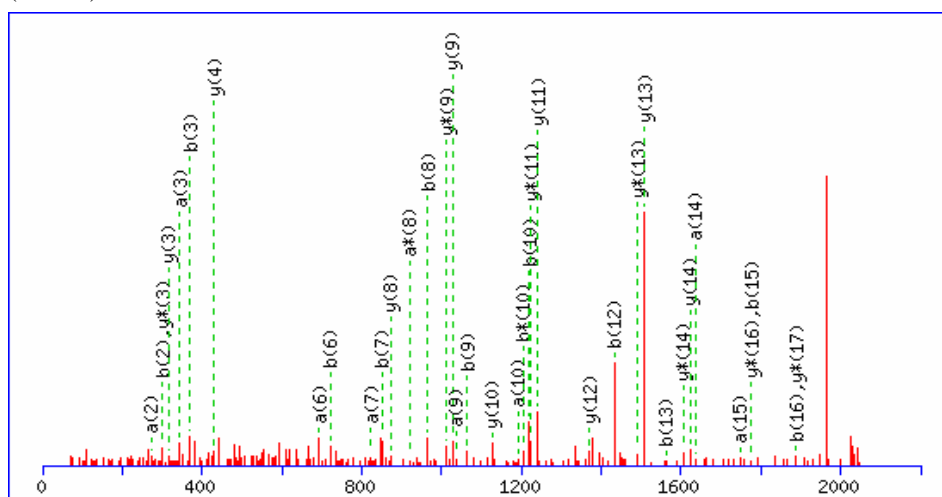

**Monoisotopic mass of neutral peptide Mr(calc): 2091.09**

**Fixed modifications:** Carbamidomethyl (C)

**Ions Score:** 39

**Matches (Bold Red):** 37/88 fragment ions using 101 most intense peaks

## 2 HACL1\_MOUSE

### MS/MS Fragmentation of **NQEAMGAFQEFPPQVEACR**

Found in **Q9QXE0**, HACL1\_MOUSE 2-hydroxyacyl-CoA lyase 1 - Mus musculus (Mouse)

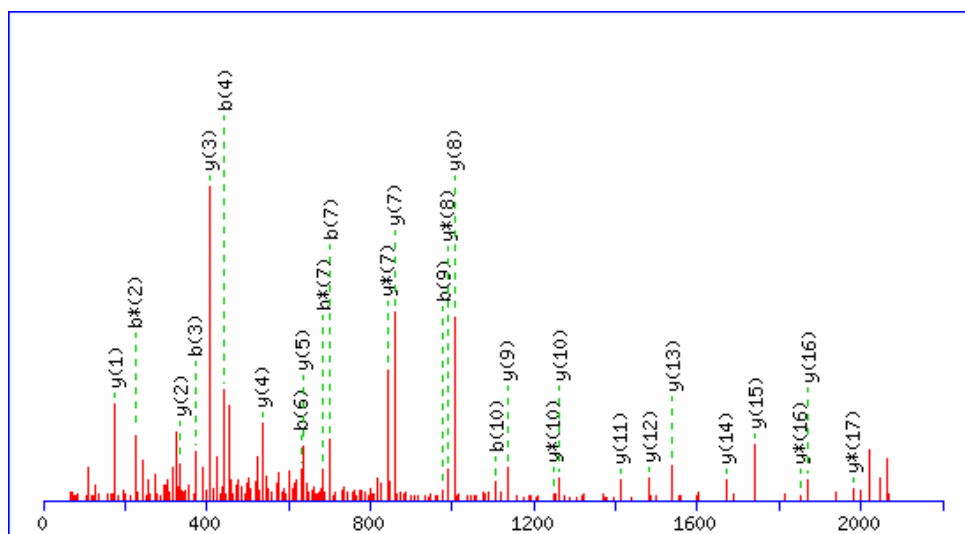

**Monoisotopic mass of neutral peptide Mr(calc):** 2110.92

**Fixed modifications:** Carbamidomethyl (C)

**Ions Score:** 114

**Matches (Bold Red):** 28/102 fragment ions using 46 most intense peaks

### MS/MS Fragmentation of **LNWILHFGLPPR**

Found in **Q9QXE0**, HACL1\_MOUSE 2-hydroxyacyl-CoA lyase 1 - Mus musculus (Mouse)

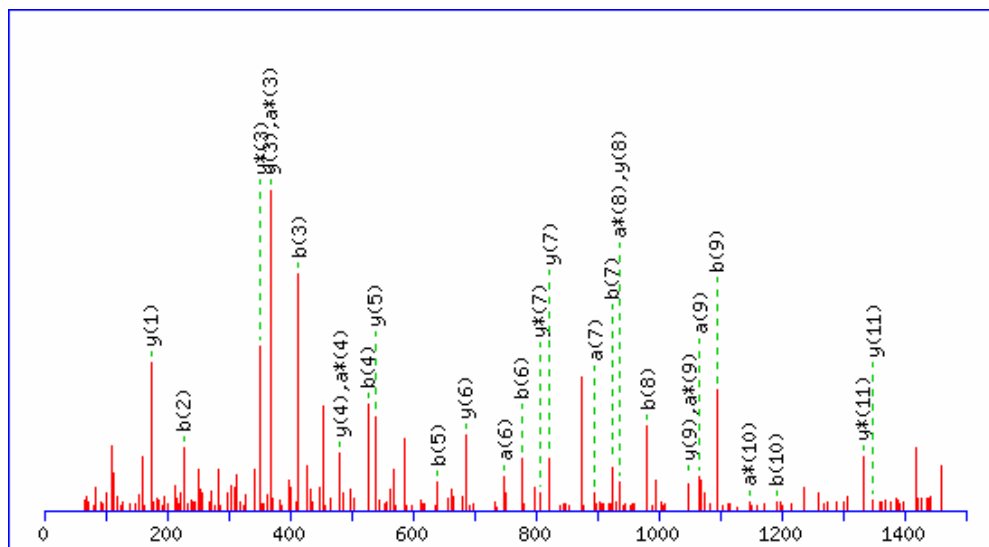

**Monoisotopic mass of neutral peptide Mr(calc):** 1461.82

**Fixed modifications:** Carbamidomethyl (C)

**Ions Score:** 48

**Matches (Bold Red):** 29/64 fragment ions using 57 most intense peaks

MS/MS Fragmentation of **VICVEGDSAFGFSGMEVETICR**

Found in **Q9QXE0**, HACL1\_MOUSE 2-hydroxyacyl-CoA lyase 1 - Mus musculus (Mouse)

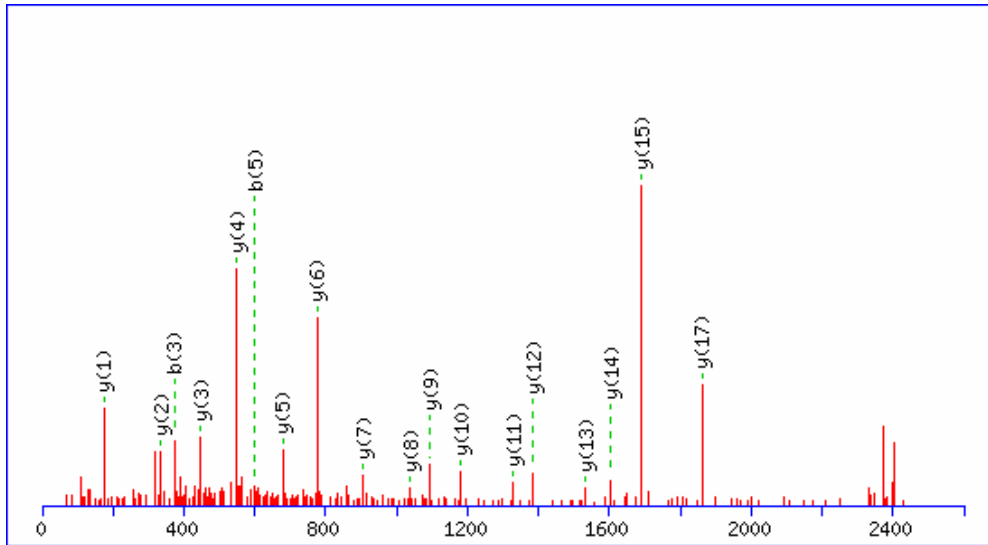

**Monoisotopic mass of neutral peptide Mr(calc):** 2462.09

**Fixed modifications:** Carbamidomethyl (C)

**Ions Score:** 134

**Matches (Bold Red):** 18/84 fragment ions using 27 most intense peaks

MS/MS Fragmentation of **AQDFHWLTR**

Found in **Q9QXE0**, HACL1\_MOUSE 2-hydroxyacyl-CoA lyase 1 - Mus musculus (Mouse)

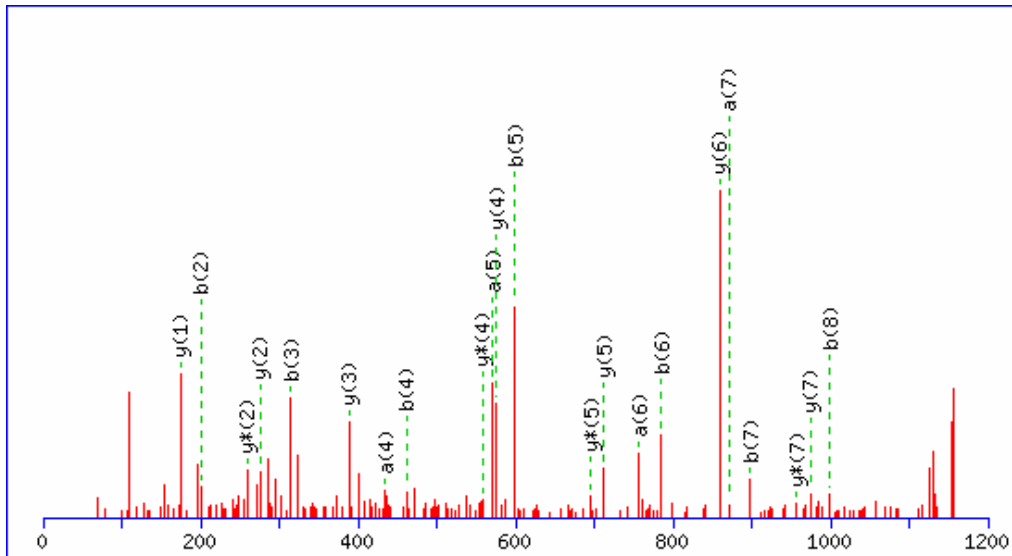

**Monoisotopic mass of neutral peptide Mr(calc):** 1172.57

**Fixed modifications:** Carbamidomethyl (C)

**Ions Score:** 38

**Matches (Bold Red):** 22/46 fragment ions using 44 most intense peaks

3 HMCS2\_MOUSE

MS/MS Fragmentation of **VNFSPPGDTSNLFPGTWYLER**

Found in **P54869**, HMCS2\_MOUSE Hydroxymethylglutaryl-CoA synthase, mitochondrial precursor - Mus musculus (Mouse)

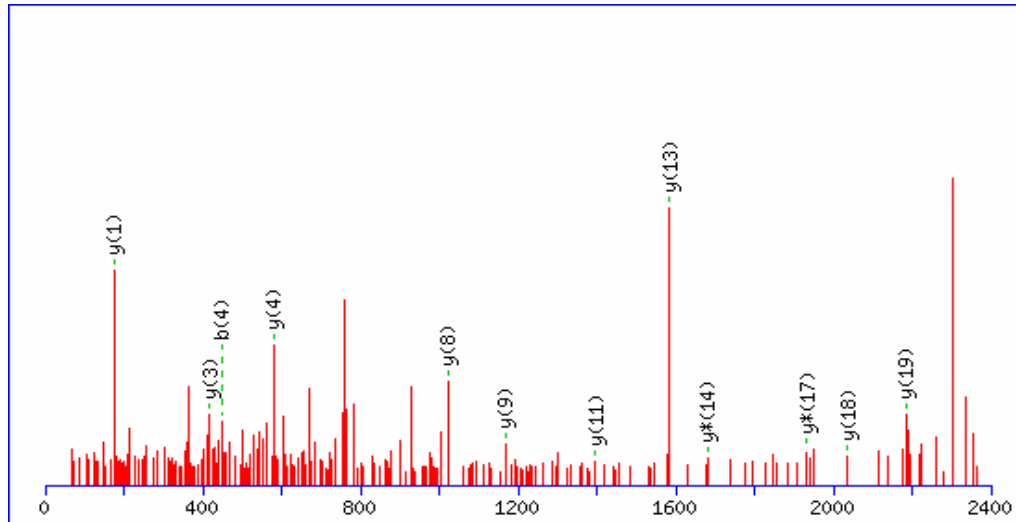

**Monoisotopic mass of neutral peptide Mr(calc):** 2396.14

**Fixed modifications:** Carbamidomethyl (C)

**Ions Score:** 39

**Matches (Bold Red):** 12/118 fragment ions using 27 most intense peaks

4 ODO2\_MOUSE

MS/MS Fragmentation of **NDVITVQTPAFAESVTEGDVR**

Found in **Q9D2G2**, ODO2\_MOUSE Dihydropolyllysine-residue succinyltransferase component of 2-oxoglutarate dehydrogenase

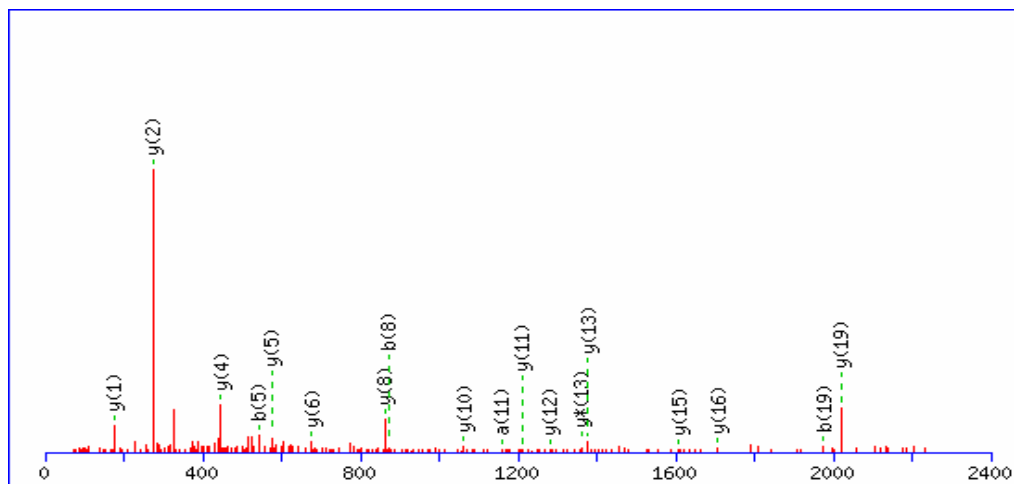

**Monoisotopic mass of neutral peptide Mr(calc): 2247.10**

**Fixed modifications:** Carbamidomethyl (C)

**Ions Score:** 93

**Matches (Bold Red):** 18/120 fragment ions using 30 most intense peaks

MS/MS Fragmentation of **VEVRPMMYVALTYDHR**

Found in **Q9D2G2**, ODO2\_MOUSE Dihydropolyllysine-residue succinyltransferase component of 2-oxoglutarate dehydrogenase

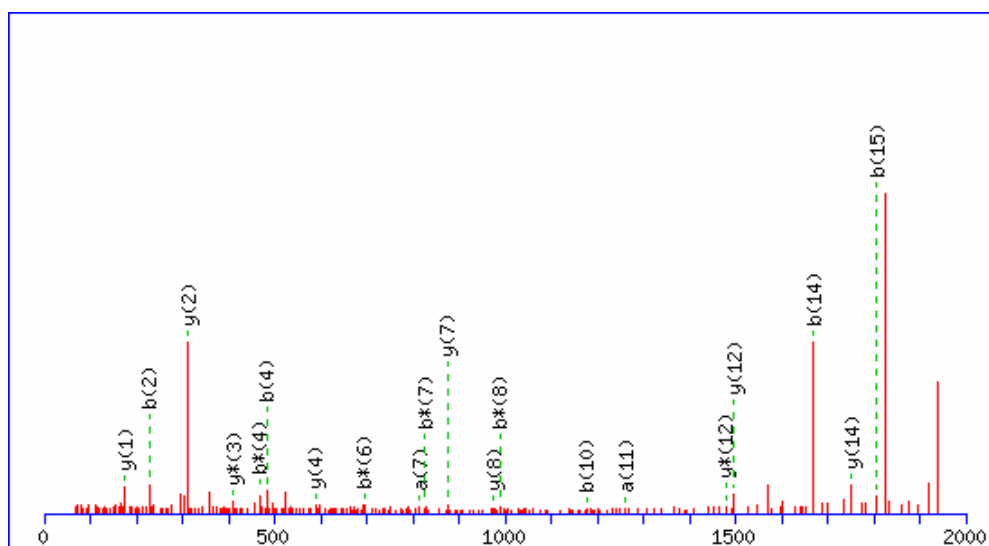

**Monoisotopic mass of neutral peptide Mr(calc): 1978.98**

**Fixed modifications:** Carbamidomethyl (C)

**Ions Score:** 23

**Matches (Bold Red):** 20/84 fragment ions using 47 most intense peaks

5 NDUBA\_MOUSE

MS/MS Fragmentation of **AYDLVVDWPVTLVR**

Found in **Q9DCS9**, NDUBA\_MOUSE NADH dehydrogenase [ubiquinone] 1 beta subcomplex subunit  
10 - Mus musculus (Mouse)

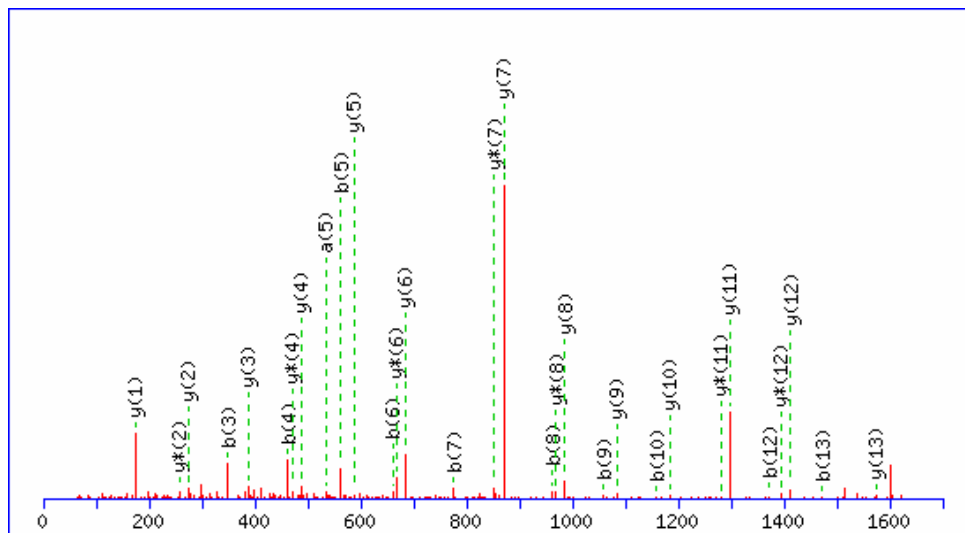

**Monoisotopic mass of neutral peptide Mr(calc):** 1644.89

**Fixed modifications:** Carbamidomethyl (C)

**Ions Score:** 83

**Matches (Bold Red):** 31/52 fragment ions using 66 most intense peaks

MS/MS Fragmentation of **DFKVDQEIMNIQER**

Found in **Q9DCS9**, NDUBA\_MOUSE NADH dehydrogenase [ubiquinone] 1 beta subcomplex subunit  
10 - Mus musculus (Mouse)

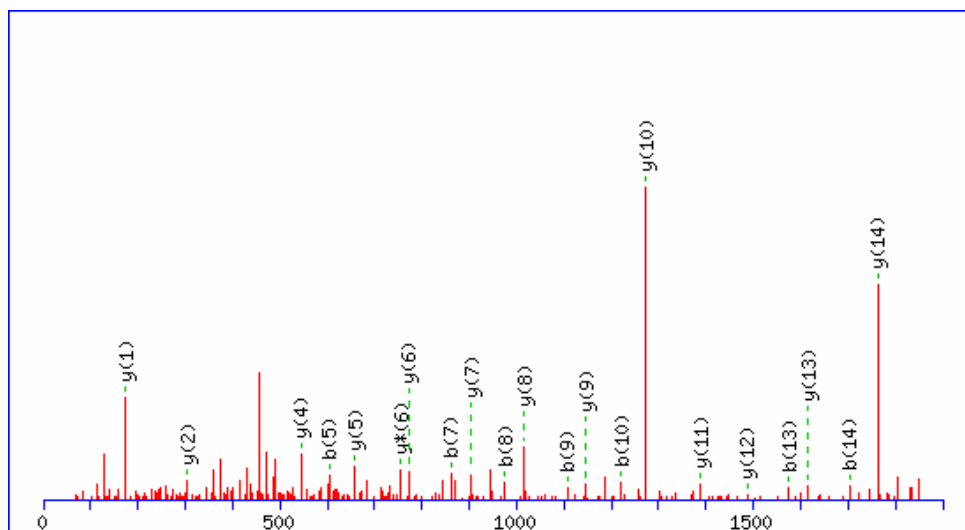

**Monoisotopic mass of neutral peptide Mr(calc):** 1876.94

**Fixed modifications:** Carbamidomethyl (C)

**Ions Score:** 96

**Matches (Bold Red):** 21/80 fragment ions using 36 most intense peaks

## MS/MS Fragmentation of **YLDLGAYYSAR**

Found in **Q9DCS9**, NDUBA\_MOUSE NADH dehydrogenase [ubiquinone] 1 beta subcomplex subunit  
10 - Mus musculus (Mouse)

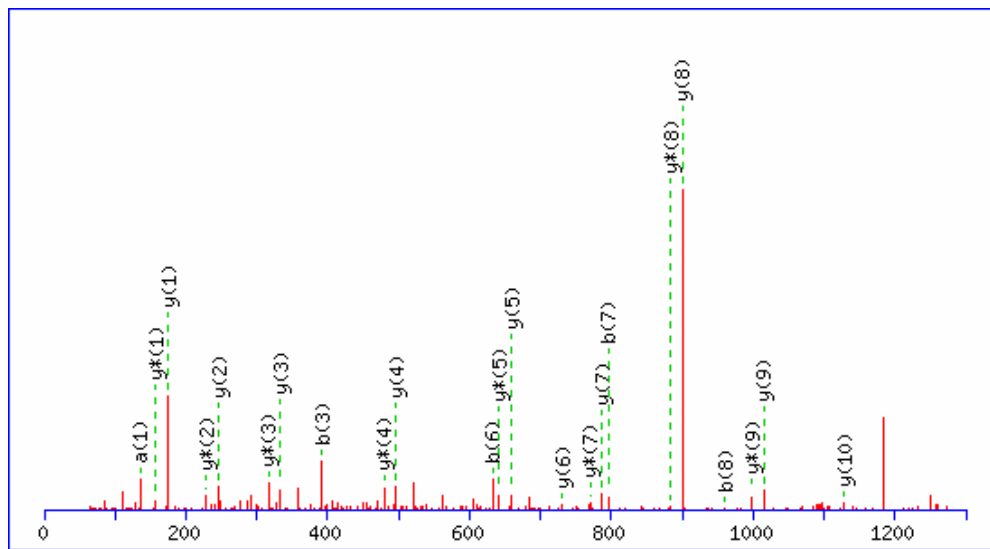

**Monoisotopic mass of neutral peptide Mr(calc):** 1290.62

**Fixed modifications:** Carbamidomethyl (C)

**Ions Score:** 76

**Matches (Bold Red):** 23/40 fragment ions using 39 most intense peaks



6 NDUAA\_MOUSE

MS/MS Fragmentation of **LQSWLYASR**

Found in **Q99LC3**, NDUAA\_MOUSE NADH dehydrogenase [ubiquinone] 1 alpha subcomplex subunit 10, mitochondrial precursor

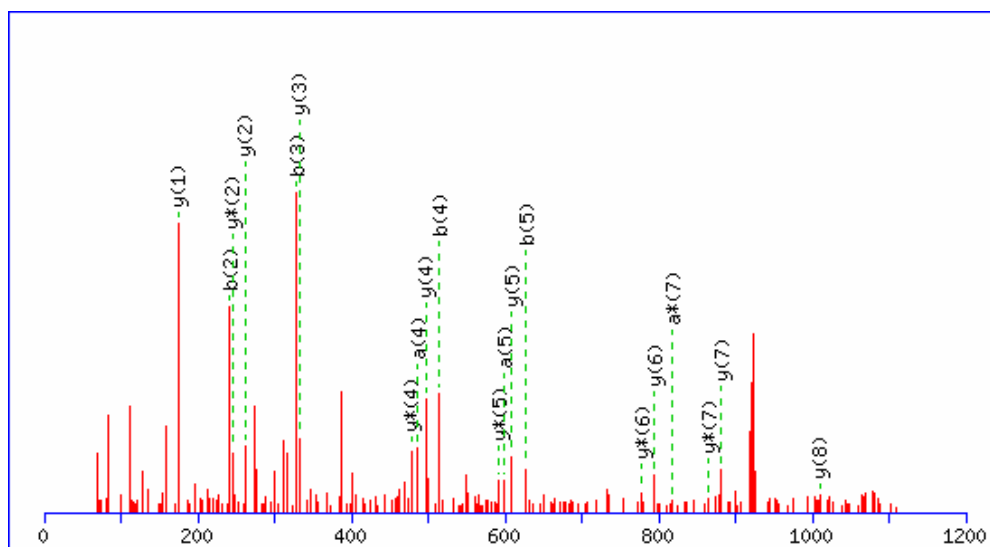

**Monoisotopic mass of neutral peptide Mr(calc):** 1122.58

**Fixed modifications:** Carbamidomethyl (C)

**Ions Score:** 40

**Matches (Bold Red):** 20/46 fragment ions using 48 most intense peaks

MS/MS Fragmentation of **LLQYADALEHLLSTGQGVVLER**

Found in **Q99LC3**, NDUAA\_MOUSE NADH dehydrogenase [ubiquinone] 1 alpha subcomplex subunit 10, mitochondrial precursor

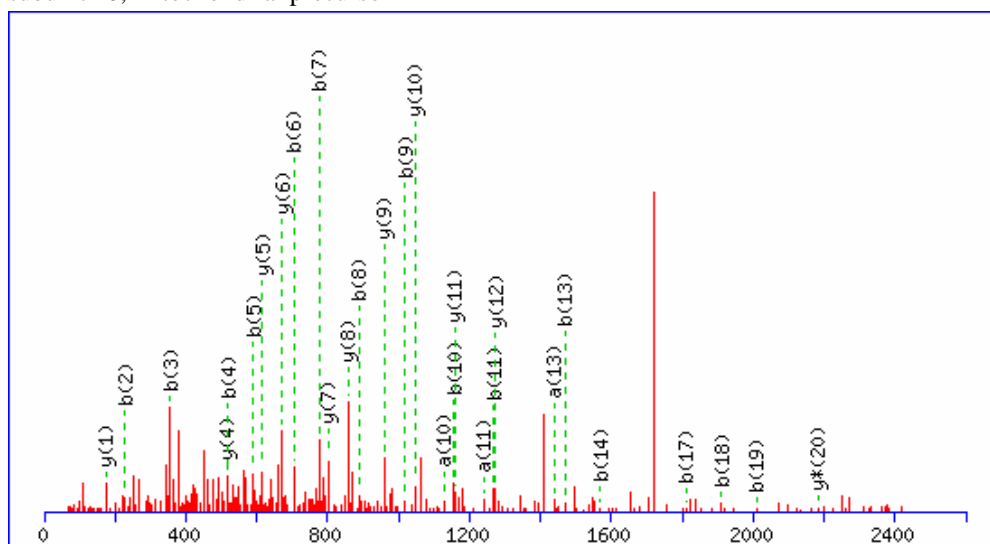

**Monoisotopic mass of neutral peptide Mr(calc):** 2424.30

**Fixed modifications:** Carbamidomethyl (C)

**Ions Score:** 44

**Matches (Bold Red):** 29/122 fragment ions using 114 most intense peaks

MS/MS Fragmentation of **LTLPEYLPPHAVIYIDVPVPEVQSR**

Found in **Q99LC3**, NDUAA\_MOUSE NADH dehydrogenase [ubiquinone] 1 alpha subcomplex subunit 10, mitochondrial precursor

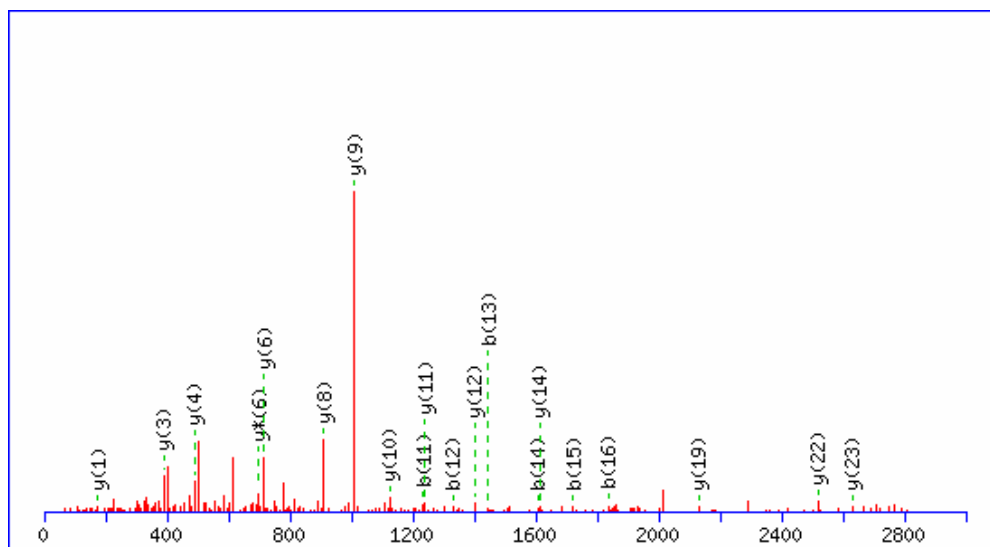

**Monoisotopic mass of neutral peptide Mr(calc):** 2844.54

**Fixed modifications:** Carbamidomethyl (C)

**Ions Score:** 52

**Matches (Bold Red):** 20/100 fragment ions using 56 most intense peaks

MS/MS Fragmentation of **QDDWTFHYLR**

Found in **Q99LC3**, NDUAA\_MOUSE NADH dehydrogenase [ubiquinone] 1 alpha subcomplex subunit 10, mitochondrial precursor

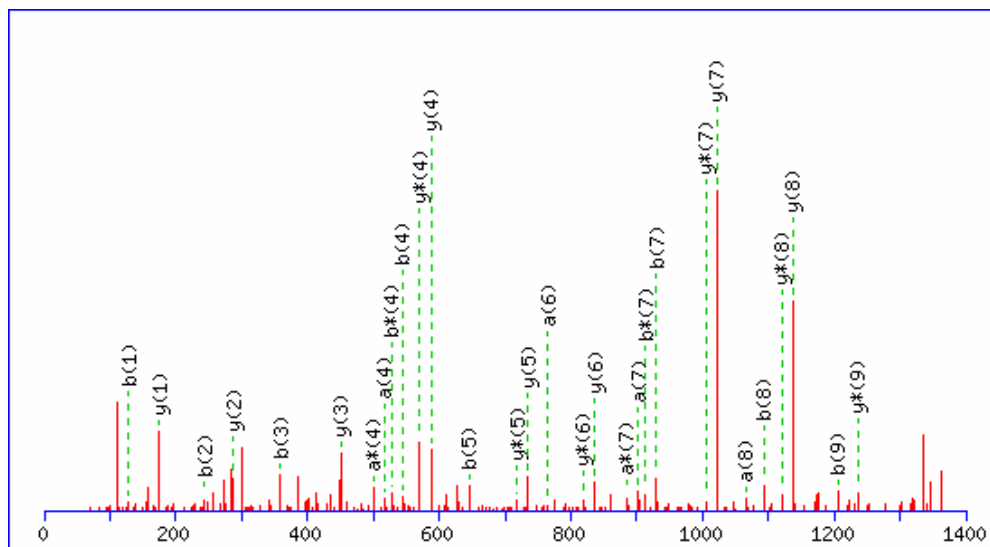

**Monoisotopic mass of neutral peptide Mr(calc):** 1379.63

**Fixed modifications:** Carbamidomethyl (C)

**Ions Score:** 49

**Matches (Bold Red):** 30/54 fragment ions using 54 most intense peaks

7 NDUS3\_MOUSE

MS/MS Fragmentation of **FEIVYNLLSLR**

Found in **Q9DCT2**, NDUS3\_MOUSE NADH dehydrogenase [ubiquinone] iron-sulfur protein 3, mitochondrial precursor

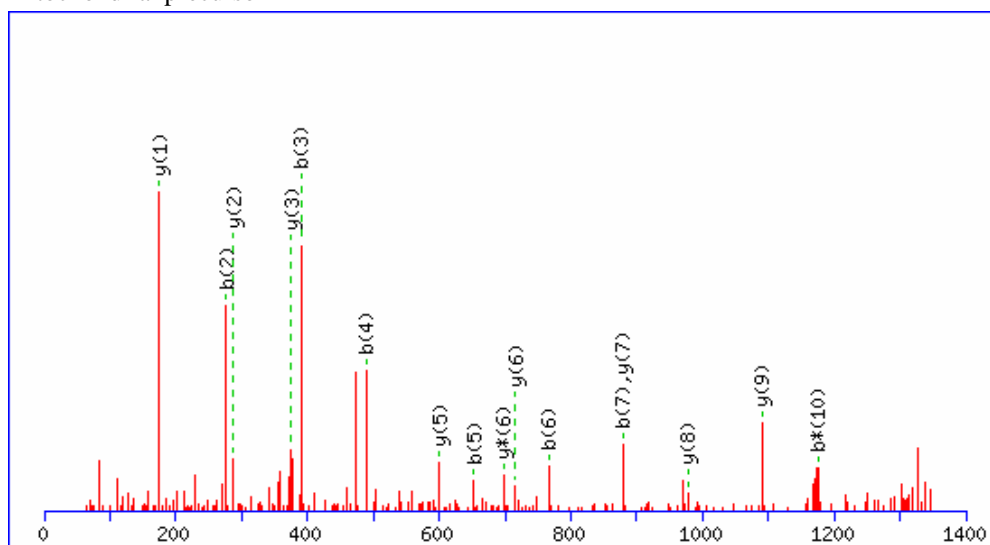

**Monoisotopic mass of neutral peptide Mr(calc):** 1365.77

**Fixed modifications:** Carbamidomethyl (C)

**Ions Score:** 53

**Matches (Bold Red):** 16/50 fragment ions using 28 most intense peaks

MS/MS Fragmentation of **ILTDYGFEQHPFR**

Found in **Q9DCT2**, NDUS3\_MOUSE NADH dehydrogenase [ubiquinone] iron-sulfur protein 3, mitochondrial precursor

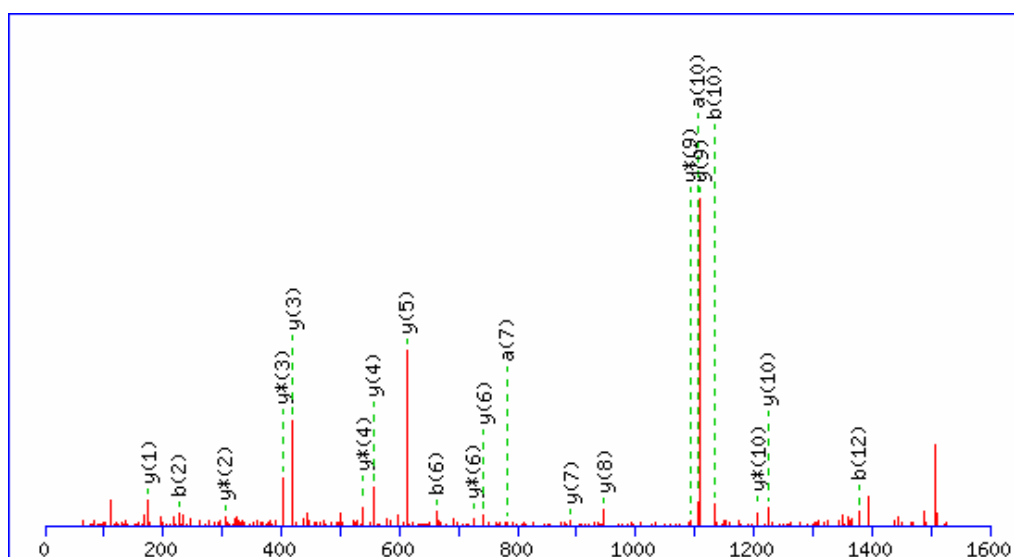

**Monoisotopic mass of neutral peptide Mr(calc):** 1550.75

**Fixed modifications:** Carbamidomethyl (C)

**Ions Score:** 66

**Matches (Bold Red):** 21/48 fragment ions using 36 most intense peaks

MS/MS Fragmentation of **DFPLTGYVELR**

Found in **Q9DCT2**, NDUS3\_MOUSE NADH dehydrogenase [ubiquinone] iron-sulfur protein 3, mitochondrial precursor

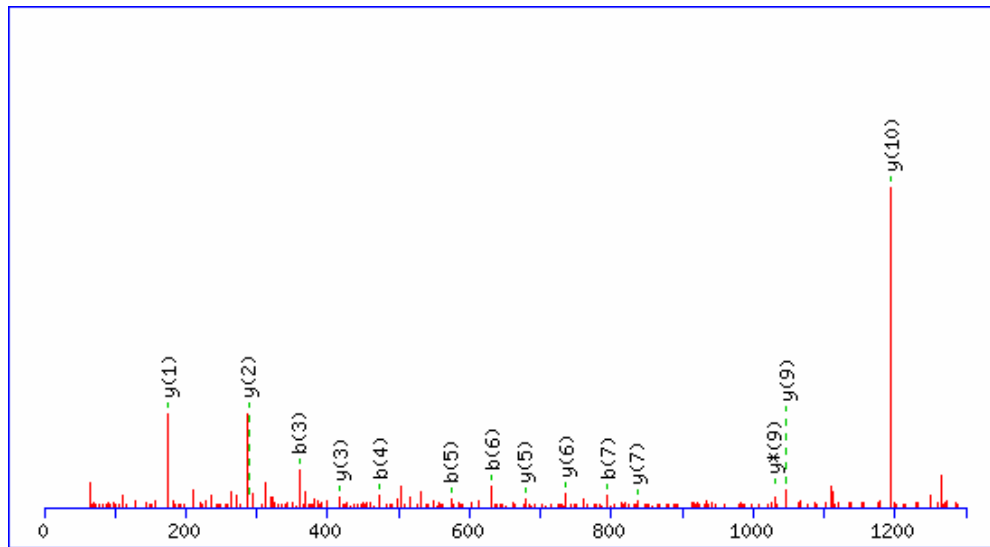

**Monoisotopic mass of neutral peptide Mr(calc):** 1308.67

**Fixed modifications:** Carbamidomethyl (C)

**Ions Score:** 50

**Matches (Bold Red):** 14/40 fragment ions using 27 most intense peaks

MS/MS Fragmentation of **VVAEPVELAQEFR**

Found in **Q9DCT2**, NDUS3\_MOUSE NADH dehydrogenase [ubiquinone] iron-sulfur protein 3, mitochondrial precursor

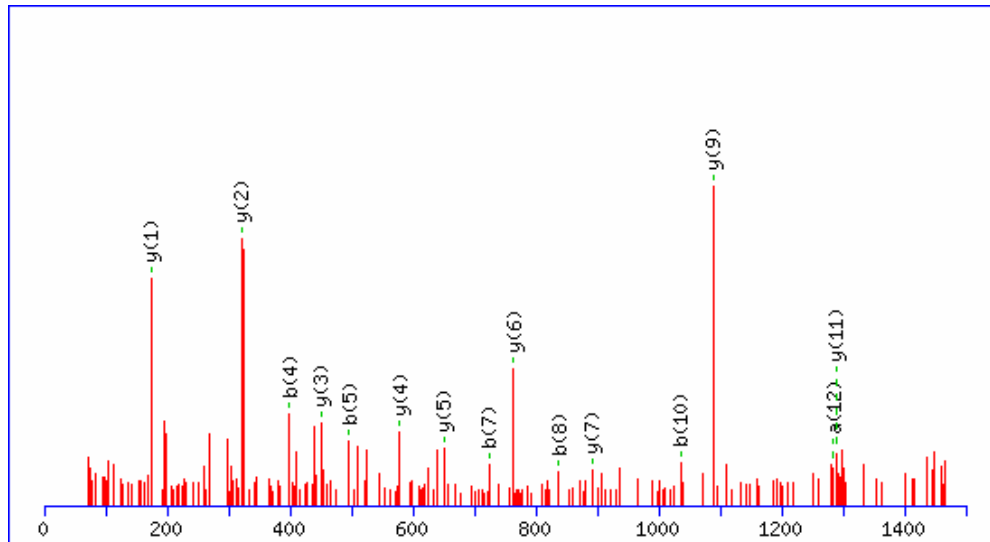

**Monoisotopic mass of neutral peptide Mr(calc):** 1485.78

**Fixed modifications:** Carbamidomethyl (C)

**Ions Score:** 54

**Matches (Bold Red):** 15/54 fragment ions using 31 most intense peaks

MS/MS Fragmentation of **KFDLNSPWAEFPAYR**

Found in **Q9DCT2**, NDUS3\_MOUSE NADH dehydrogenase [ubiquinone] iron-sulfur protein 3, mitochondrial precursor

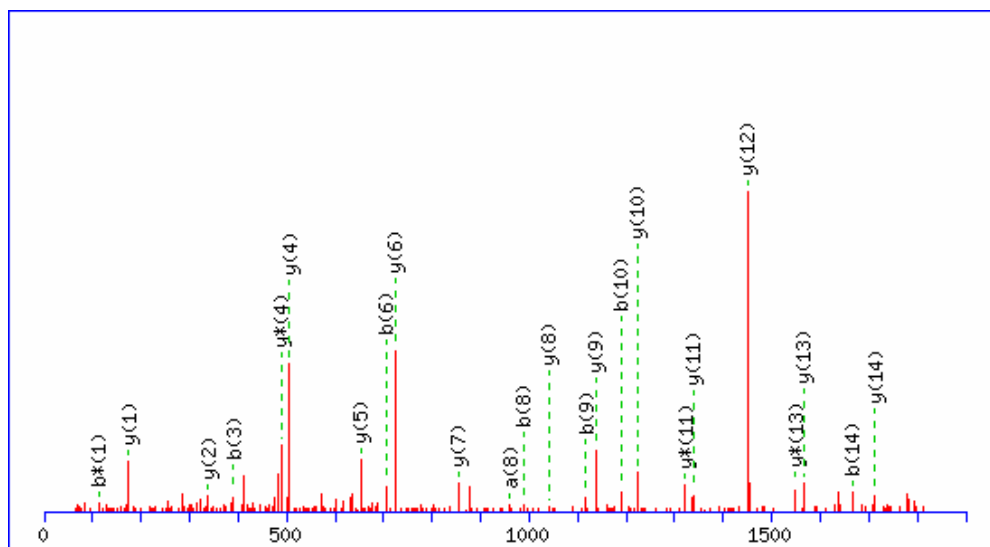

**Monoisotopic mass of neutral peptide Mr(calc):** 1839.89

**Fixed modifications:** Carbamidomethyl (C)

**Ions Score:** 103

**Matches (Bold Red):** 24/84 fragment ions using 37 most intense peaks

MS/MS Fragmentation of **FDLNSPWAEFPAYR**

Found in **Q9DCT2**, NDUS3\_MOUSE NADH dehydrogenase [ubiquinone] iron-sulfur protein 3, mitochondrial precursor

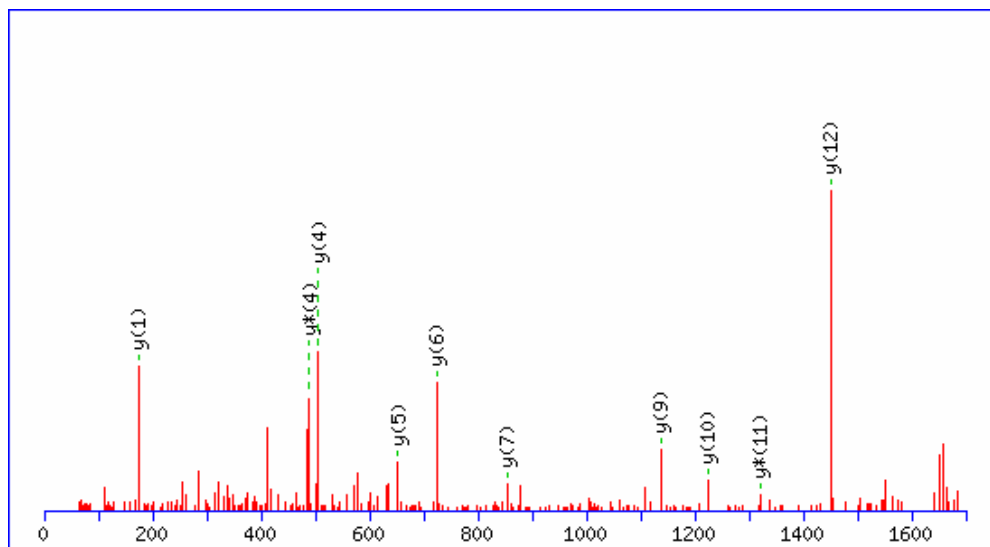

**Monoisotopic mass of neutral peptide Mr(calc):** 1711.80

**Fixed modifications:** Carbamidomethyl (C)

**Ions Score:** 49

**Matches (Bold Red):** 10/72 fragment ions using 20 most intense peaks

8 UCRI\_MOUSE

MS/MS Fragmentation of **VPDFSDYRR**

Found in **Q9CR68**, UCRI\_MOUSE Ubiquinol-cytochrome c reductase iron-sulfur subunit, mitochondrial precursor

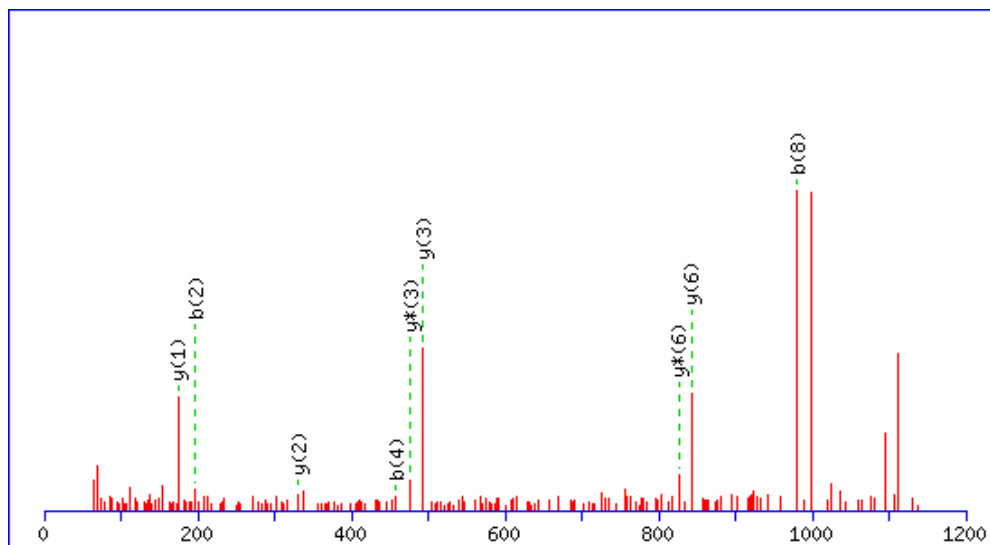

**Monoisotopic mass of neutral peptide Mr(calc): 1153.55**

**Fixed modifications:** Carbamidomethyl (C)

**Ions Score:** 17

**Matches (Bold Red):** 9/34 fragment ions using 23 most intense peaks

MS/MS Fragmentation of **KGPAPLNLEVPAYEFTSDDVVVVG**

Found in **Q9CR68**, UCRI\_MOUSE Ubiquinol-cytochrome c reductase iron-sulfur subunit, mitochondrial precursor

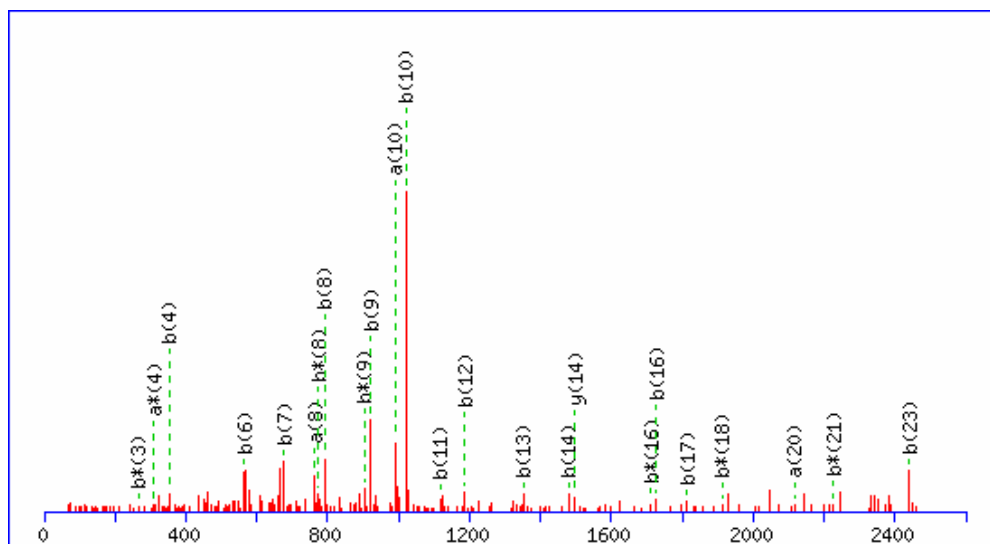

**Monoisotopic mass of neutral peptide Mr(calc): 2515.28**

**Fixed modifications:** Carbamidomethyl (C)

**Ions Score:** 66

**Matches (Bold Red):** 24/121 fragment ions using 54 most intense peaks

9 ETFA\_MOUSE

MS/MS Fragmentation of **QFSYTHICAGASAFGK**

Found in **Q99LC5**, ETFA\_MOUSE Electron transfer flavoprotein subunit alpha, mitochondrial precursor

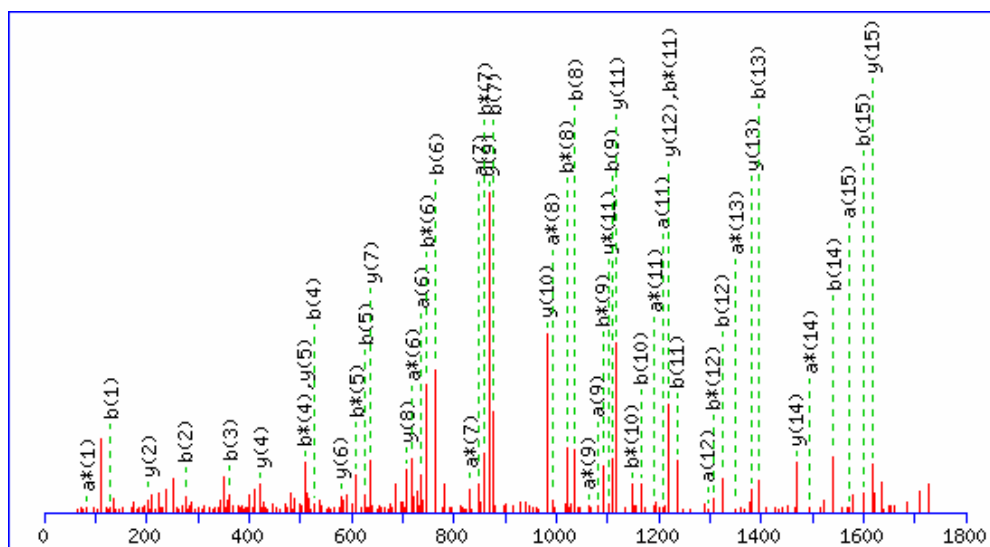

**Monoisotopic mass of neutral peptide Mr(calc):** 1743.80

**Fixed modifications:** Carbamidomethyl (C)

**Ions Score:** 89

**Matches (Bold Red):** 52/90 fragment ions using 116 most intense peaks

MS/MS Fragmentation of **LLYDLADQLHAAVGASR**

Found in **Q99LC5**, ETFA\_MOUSE Electron transfer flavoprotein subunit alpha, mitochondrial precursor

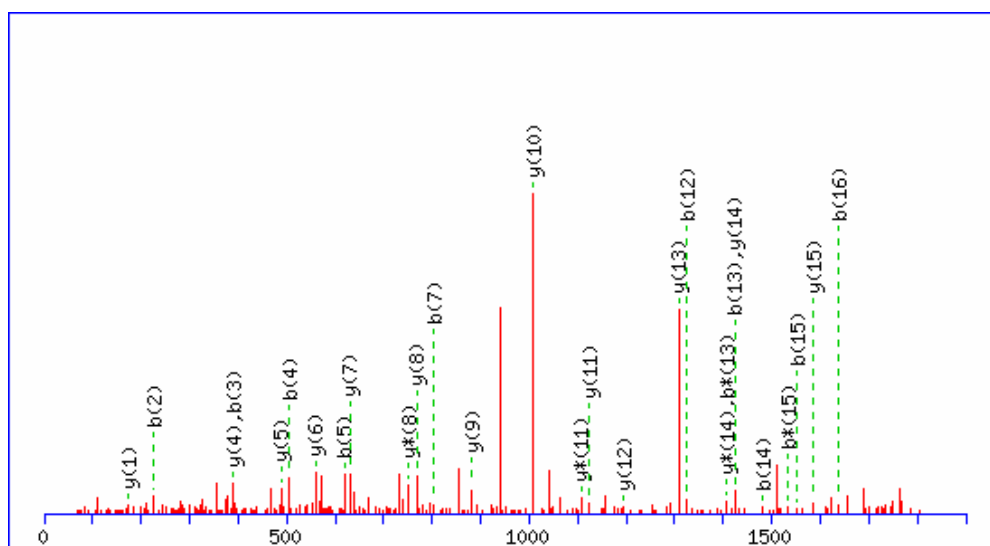

**Monoisotopic mass of neutral peptide Mr(calc):** 1811.95

**Fixed modifications:** Carbamidomethyl (C)

**Ions Score:** 62

**Matches (Bold Red):** 28/82 fragment ions using 70 most intense peaks

MS/MS Fragmentation of **IVAPELYIAVGISGAIQHLAGMK**

Found in **Q99LC5**, ETFA\_MOUSE Electron transfer flavoprotein subunit alpha, mitochondrial precursor

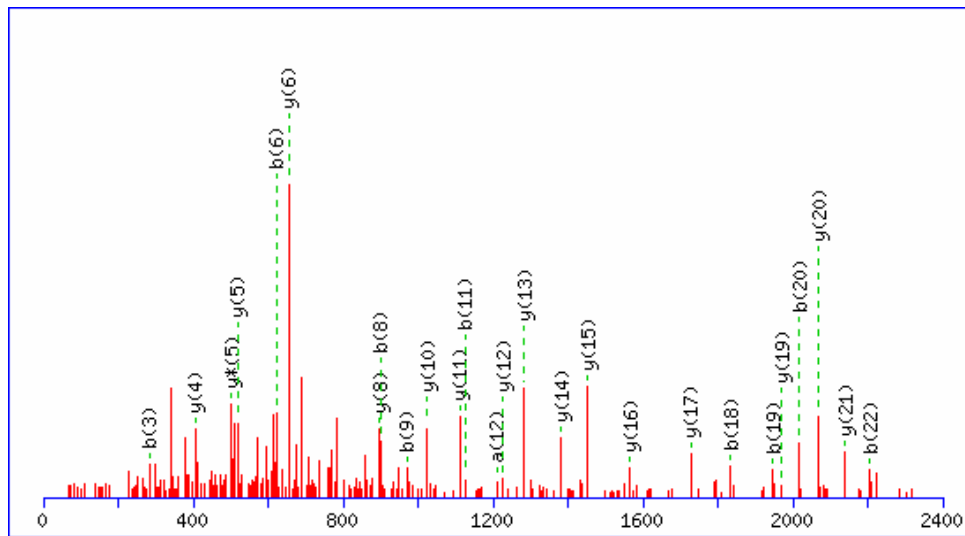

**Monoisotopic mass of neutral peptide Mr(calc): 2350.31**

**Fixed modifications:** Carbamidomethyl (C)

**Ions Score:** 98

**Matches (Bold Red):** 26/100 fragment ions using 48 most intense peaks



10 PRDX3\_MOUSE

MS/MS Fragmentation of **DYGVLLSAGIALR**

Found in **P20108**, PRDX3\_MOUSE Thioredoxin-dependent peroxide reductase, mitochondrial precursor

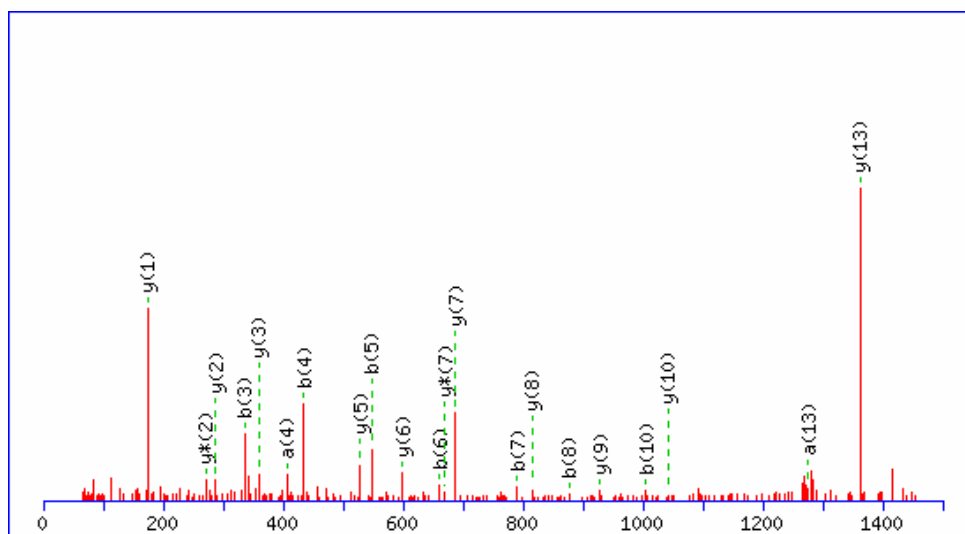

**Monoisotopic mass of neutral peptide Mr(calc):** 1475.80

**Fixed modifications:** Carbamidomethyl (C)

**Ions Score:** 66

**Matches (Bold Red):** 21/52 fragment ions using 34 most intense peaks

MS/MS Fragmentation of **HLSVNDLPVGR**

Found in **P20108**, PRDX3\_MOUSE Thioredoxin-dependent peroxide reductase, mitochondrial precursor

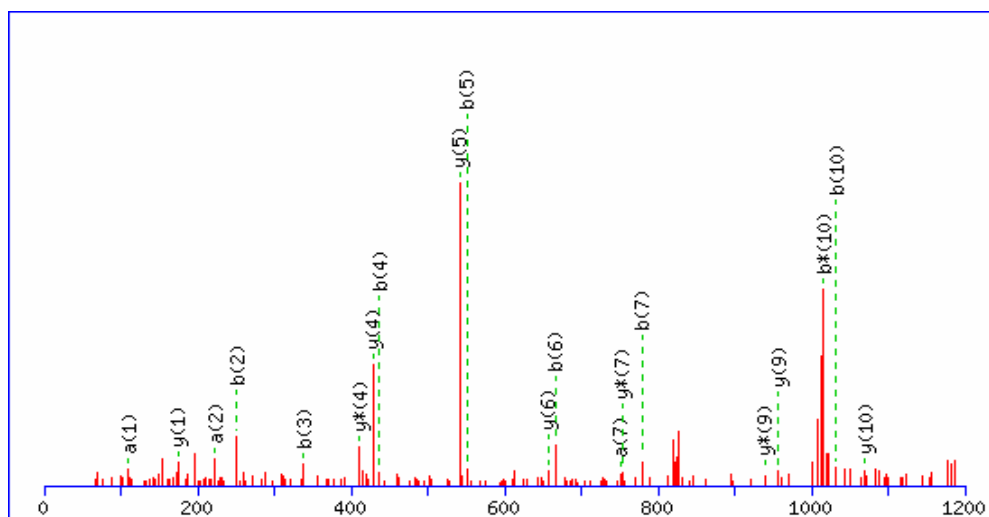

**Monoisotopic mass of neutral peptide Mr(calc):** 1205.65

**Fixed modifications:** Carbamidomethyl (C)

**Ions Score:** 28

**Matches (Bold Red):** 20/52 fragment ions using 54 most intense peaks
