# Supplementary material
Source: PubMed Central journal article supplement (PMC2556018)
Supplement: M800109-MCP200_2.pdf [file M800109-MCP200_2.pdf]

Supplemental Fig. S2 illustrates ESI-FTICR mass spectra of ICAT-labeled peptides from the changed proteins that are listed in Table 2, and the detailed information of Mascot search results.

1 OAT\_MOUSE

MS/MS Fragmentation of **QYFDFLSAYGAVSQGHCHPK**

Found in **P29758**, OAT\_MOUSE Ornithine aminotransferase, mitochondrial precursor

Variable modifications: **C17** : ICAT\_heavy

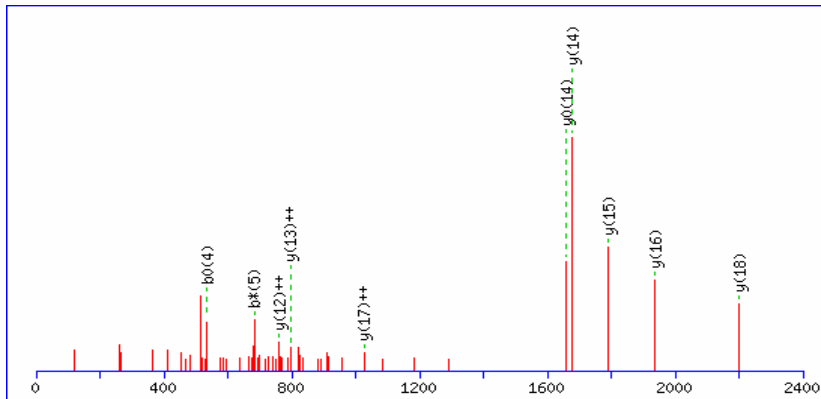

Monoisotopic mass of neutral peptide Mr(calc): 2490.18

Ions Score: 14

Matches (**Bold Red**): 10/208 fragment ions using 23 most intense peaks

2 GLNA\_MOUSE

MS/MS Fragmentation of **RPSANCDPYAVTEAIVR**

Found in **P15105**, GLNA\_MOUSE Glutamine synthetase - Mus musculus (Mouse)

Variable modifications: **C6** : ICAT\_light

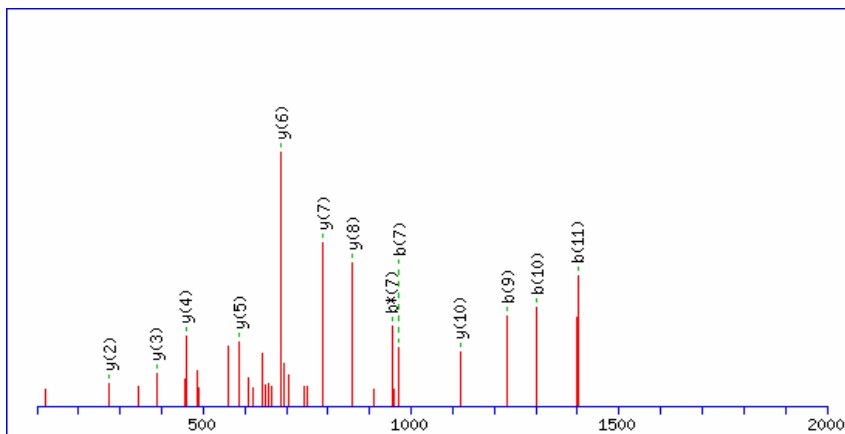

Monoisotopic mass of neutral peptide Mr(calc): 2088.04

Ions Score: 73

Matches (**Bold Red**): 13/180 fragment ions using 16 most intense peaks

MS/MS Fragmentation of **LVLCEVFK**

Found in **P15105**, GLNA\_MOUSE Glutamine synthetase - Mus musculus (Mouse)

Variable modifications: C4 : ICAT\_light

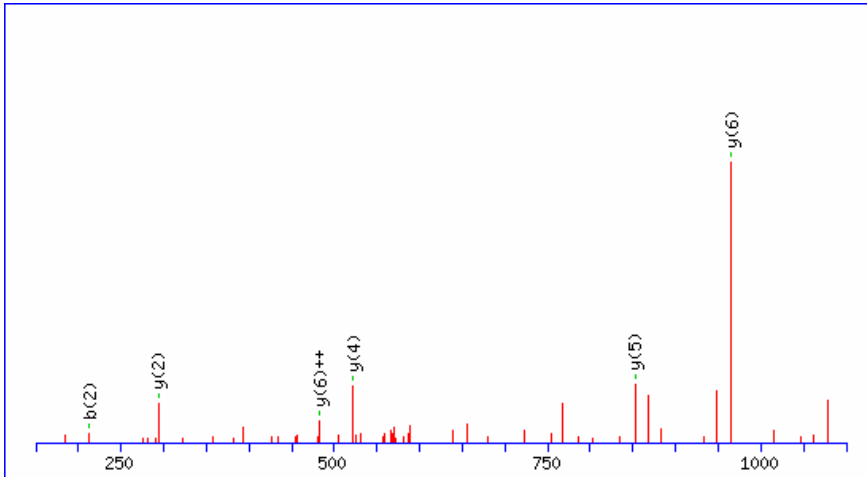

**Monoisotopic mass of neutral peptide Mr(calc):** 1176.66

**Ions Score:** 27

**Matches (Bold Red):** 6/56 fragment ions using 11 most intense peaks

MS/MS Fragmentation of **LVLCEVFK**

Found in **P15105**, GLNA\_MOUSE Glutamine synthetase - Mus musculus (Mouse)

Variable modifications: C4 : ICAT\_heavy

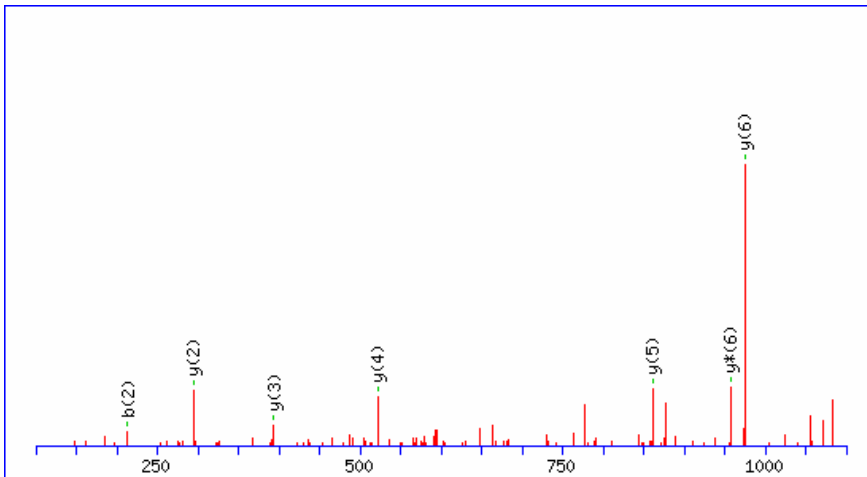

**Monoisotopic mass of neutral peptide Mr(calc):** 1185.69

**Ions Score:** 34

**Matches (Bold Red):** 7/56 fragment ions using 14 most intense peaks

3 AL4A1\_MOUSE

MS/MS Fragmentation of **FCYADK**

Found in **Q8CHT0**, AL4A1\_MOUSE Delta-1-pyrroline-5-carboxylate dehydrogenase, mitochondrial precursor

Variable modifications: **C2** : ICAT\_light

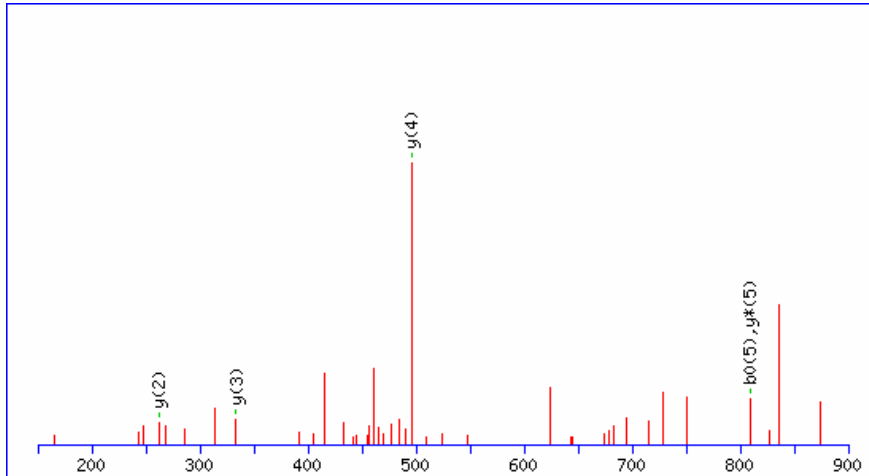

**Monoisotopic mass of neutral peptide Mr(calc):** 972.44

**Ions Score:** 18

**Matches (Bold Red):** 5/40 fragment ions using 23 most intense peaks

MS/MS Fragmentation of **CSACSR**

Found in **Q8CHT0**, AL4A1\_MOUSE Delta-1-pyrroline-5-carboxylate dehydrogenase, mitochondrial precursor

Variable modifications: **C1** : ICAT\_light **C4** : ICAT\_light

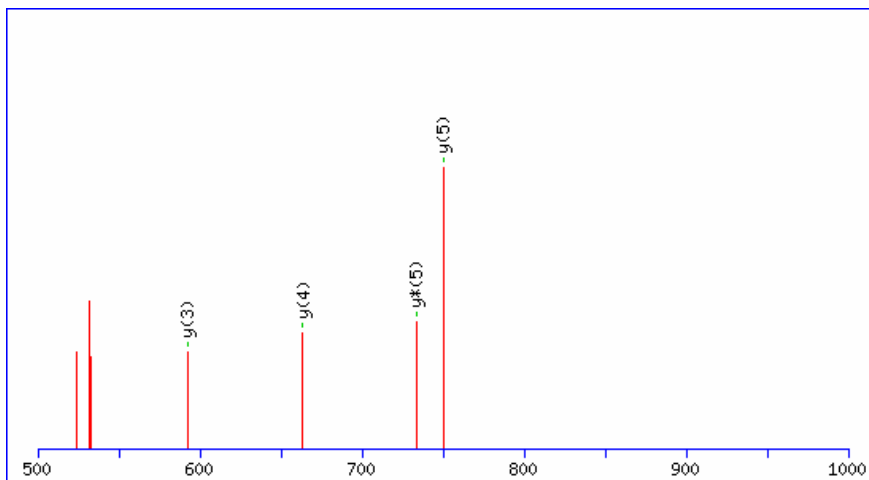

**Monoisotopic mass of neutral peptide Mr(calc):** 1079.49

**Ions Score:** 21

**Matches (Bold Red):** 4/46 fragment ions using 9 most intense peaks

MS/MS Fragmentation of **CSACSR**

Found in **Q8CHT0**, AL4A1\_MOUSE Delta-1-pyrroline-5-carboxylate dehydrogenase, mitochondrial precursor

Variable modifications: **C1** : ICAT\_heavy **C4** : ICAT\_heavy

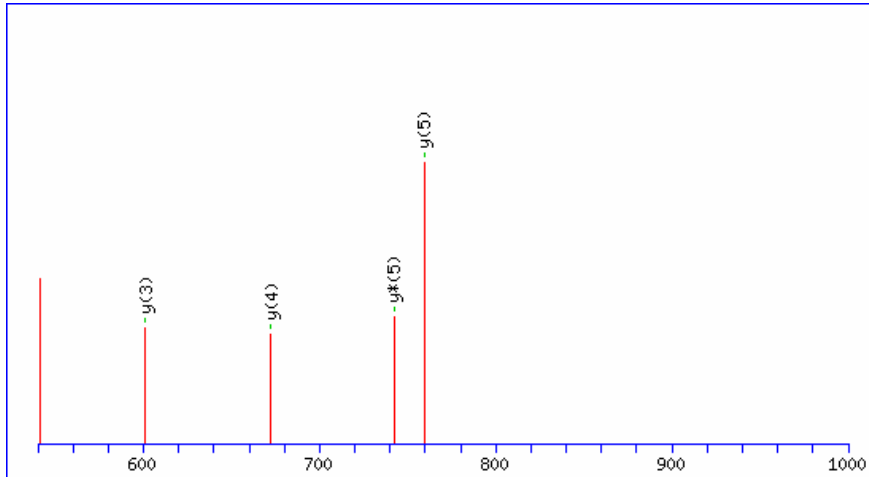

**Monoisotopic mass of neutral peptide Mr(calc):** 1097.55

**Ions Score:** 29

**Matches (Bold Red):** 4/46 fragment ions using 6 most intense peaks

4 URIC\_MOUSE

MS/MS Fragmentation of **CFATQVYCK**

Found in **P25688**, URIC\_MOUSE Uricase - Mus musculus (Mouse)

Variable modifications: **C1** : ICAT\_light **C8** : ICAT\_light

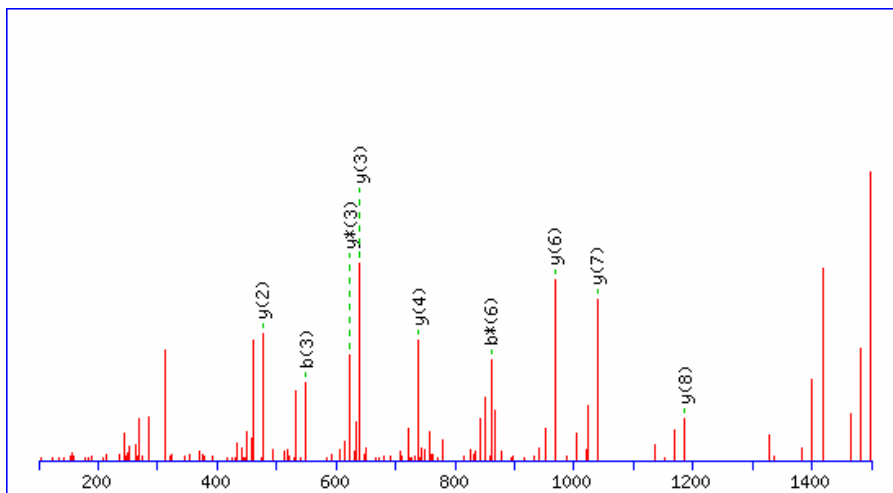

**Monoisotopic mass of neutral peptide Mr(calc):** 1515.72

**Ions Score:** 42

**Matches (Bold Red):** 9/72 fragment ions using 22 most intense peaks

MS/MS Fragmentation of **CFATQVYCK**

Found in **P25688**, URIC\_MOUSE Uricase - Mus musculus (Mouse)

Variable modifications: **C1** : ICAT\_heavy **C8** : ICAT\_heavy

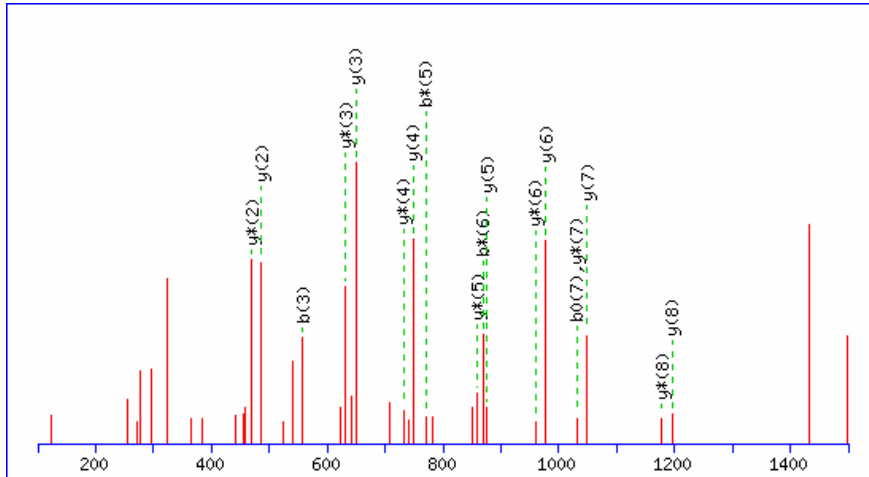

**Monoisotopic mass of neutral peptide Mr(calc):** 1533.78

**Ions Score:** 42

**Matches (Bold Red):** 18/72 fragment ions using 39 most intense peaks

MS/MS Fragmentation of **DRCFATQVYCK**

Found in **P25688**, URIC\_MOUSE Uricase - Mus musculus (Mouse)

Variable modifications: **C3** : ICAT\_light **C10** : ICAT\_light

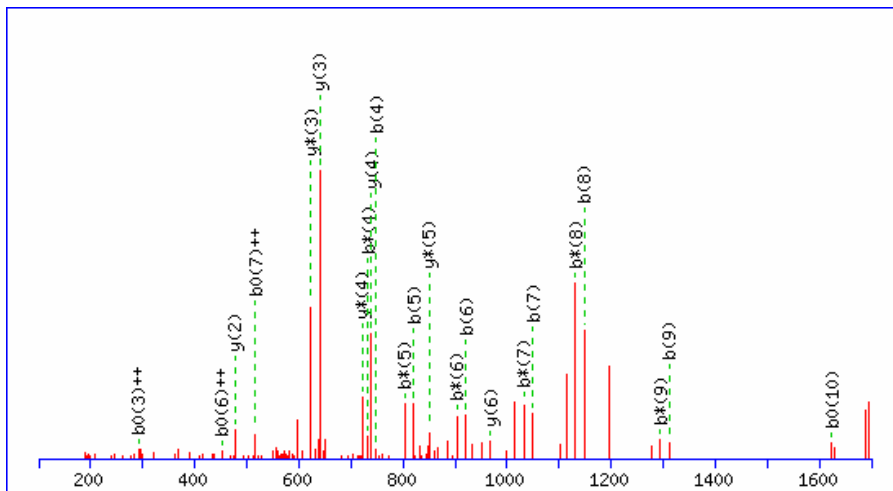

**Monoisotopic mass of neutral peptide Mr(calc):** 1786.85

**Ions Score:** 23

**Matches (Bold Red):** 23/108 fragment ions using 51 most intense peaks

5 ACOX1\_MOUSE

MS/MS Fragmentation of **ACTIAIR**

Found in **Q9R0H0**, ACOX1\_MOUSE Acyl-coenzyme A oxidase 1

Variable modifications: C2 : ICAT\_light

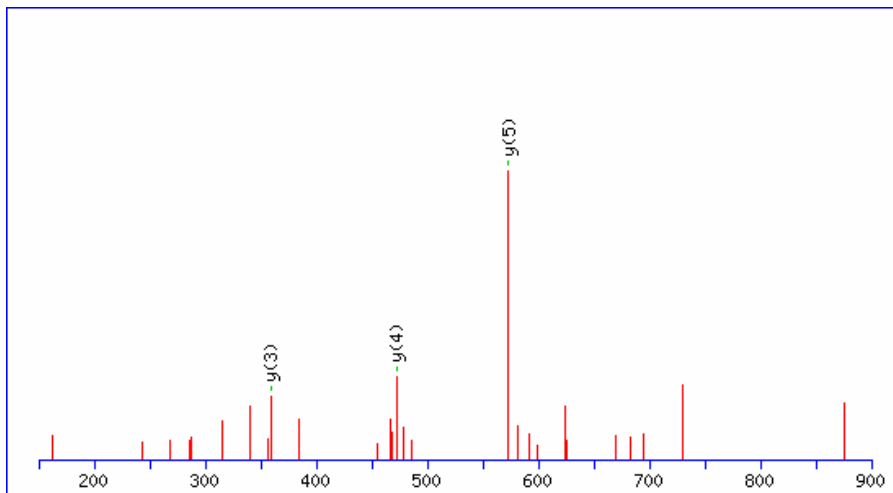

**Monoisotopic mass of neutral peptide Mr(calc):** 973.54

**Ions Score:** 17

**Matches (Bold Red):** 3/48 fragment ions using 10 most intense peaks

MS/MS Fragmentation of **ACTIAIR**

Found in **Q9R0H0**, ACOX1\_MOUSE Acyl-coenzyme A oxidase 1

Variable modifications: C2 : ICAT\_heavy

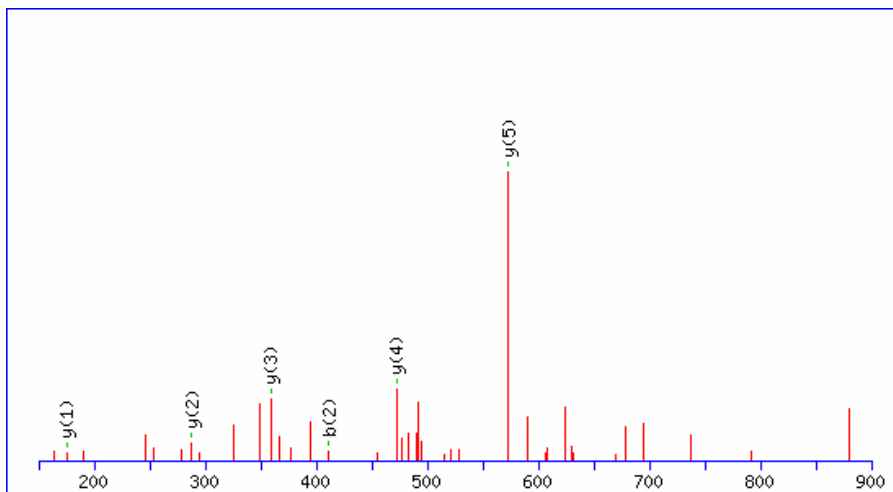

**Monoisotopic mass of neutral peptide Mr(calc):** 982.57

**Ions Score:** 16

**Matches (Bold Red):** 6/48 fragment ions using 36 most intense peaks

MS/MS Fragmentation of **GECYGLHAFVVPIR**

Found in **Q9R0H0**, ACOX1\_MOUSE Acyl-coenzyme A oxidase 1

Variable modifications: **C3** : ICAT\_light

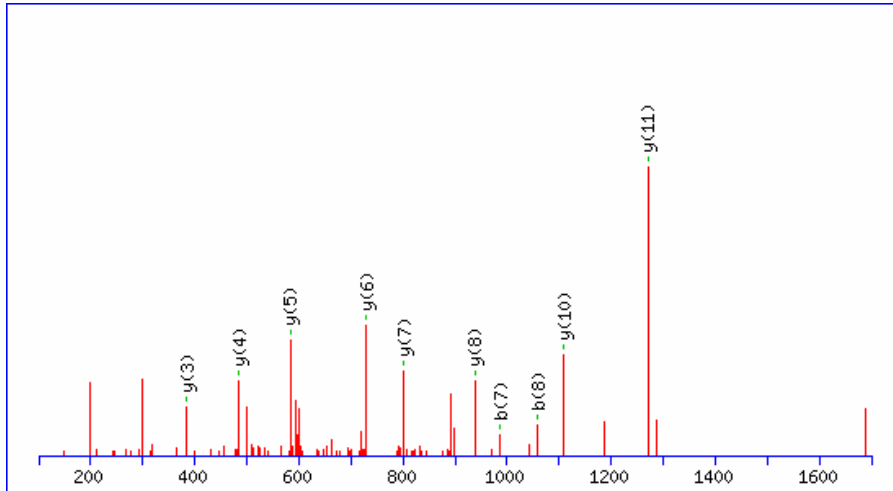

**Monoisotopic mass of neutral peptide Mr(calc):** 1786.92

**Ions Score:** 62

**Matches (Bold Red):** 10/104 fragment ions using 19 most intense peaks

MS/MS Fragmentation of **GECYGLHAFVVPIR**

Found in **Q9R0H0**, ACOX1\_MOUSE Acyl-coenzyme A oxidase 1

Variable modifications: **C3** : ICAT\_heavy

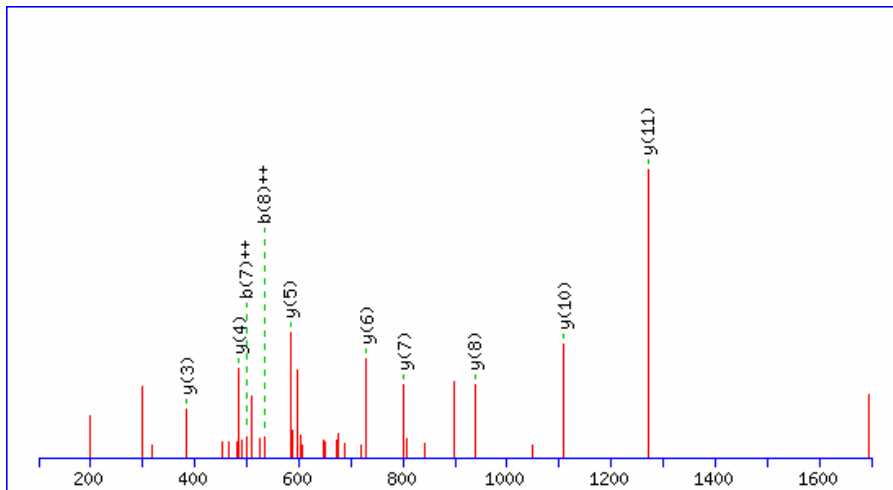

**Monoisotopic mass of neutral peptide Mr(calc):** 1795.95

**Ions Score:** 45

**Matches (Bold Red):** 10/104 fragment ions using 26 most intense peaks

MS/MS Fragmentation of **NLCLLYSLYGISQK**

Found in **Q9R0H0**, ACOX1\_MOUSE Acyl-coenzyme A oxidase 1

Variable modifications: C3 : ICAT\_light

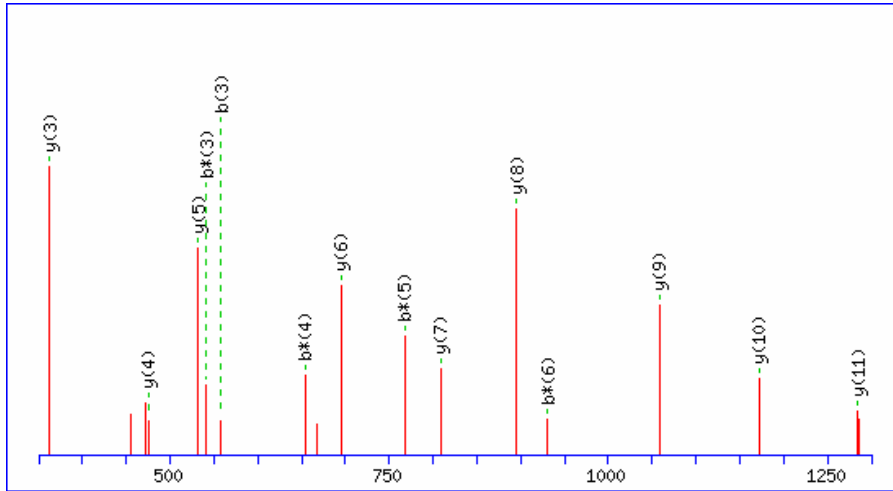

Monoisotopic mass of neutral peptide Mr(calc): 1840.98

Ions Score: 71

Matches (**Bold Red**): 14/140 fragment ions using 20 most intense peaks

MS/MS Fragmentation of **NLCLLYSLYGISQK**

Found in **Q9R0H0**, ACOX1\_MOUSE Acyl-coenzyme A oxidase 1

Variable modifications: C3 : ICAT\_heavy

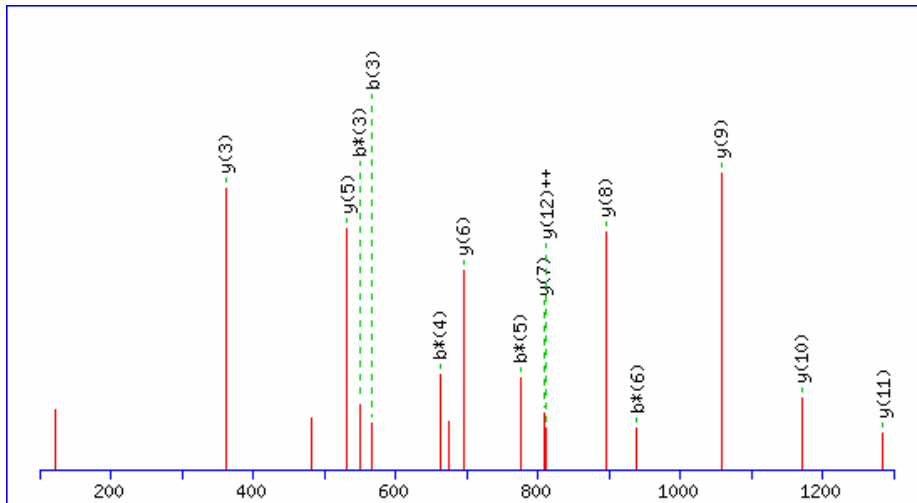

Monoisotopic mass of neutral peptide Mr(calc): 1850.01

Ions Score: 66

Matches (**Bold Red**): 14/140 fragment ions using 18 most intense peaks



6 ECHP\_MOUSE

MS/MS Fragmentation of **CLYSLINEAFR**

Found in **Q9DBM2**, ECHP\_MOUSE Peroxisomal bifunctional enzyme

Variable modifications: C1 : ICAT\_light

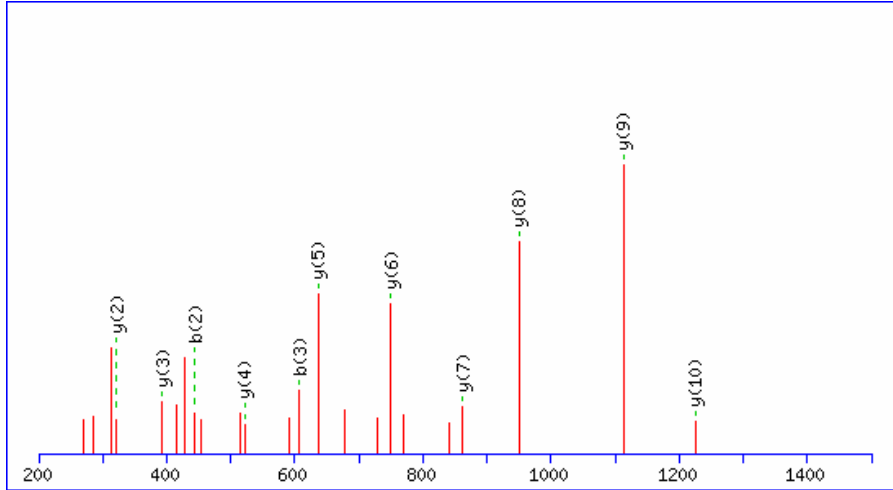

**Monoisotopic mass of neutral peptide Mr(calc):** 1554.79

**Ions Score:** 64

**Matches (Bold Red):** 11/96 fragment ions using 22 most intense peaks

MS/MS Fragmentation of **CLYSLINEAFR**

Found in **Q9DBM2**, ECHP\_MOUSE Peroxisomal bifunctional enzyme

Variable modifications: C1 : ICAT\_heavy

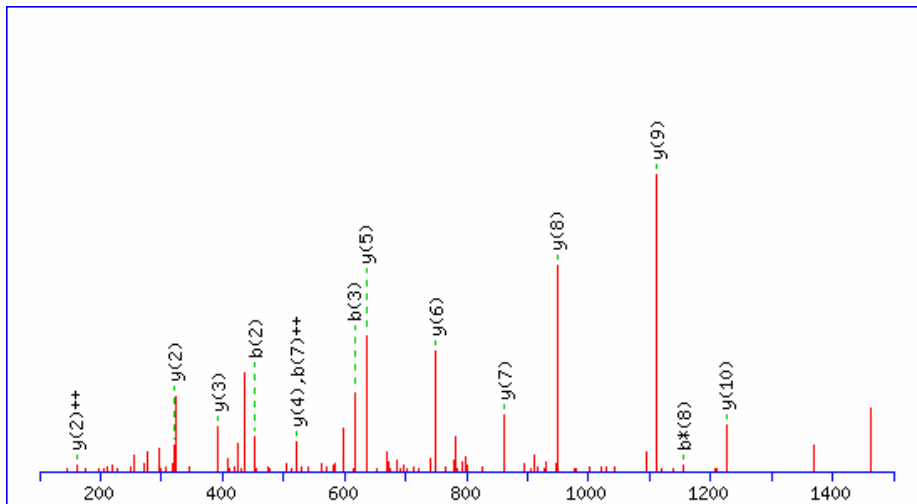

**Monoisotopic mass of neutral peptide Mr(calc):** 1563.82

**Ions Score:** 59

**Matches (Bold Red):** 14/96 fragment ions using 39 most intense peaks

MS/MS Fragmentation of **YSPIADMLCEAGR**

Found in **Q9DBM2**, ECHP\_MOUSE Peroxisomal bifunctional enzyme

Variable modifications: **C9** : ICAT\_light

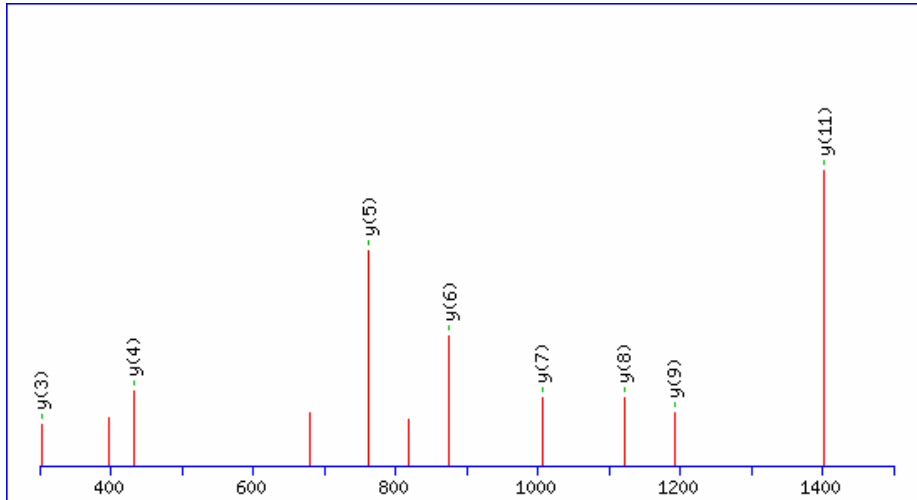

**Monoisotopic mass of neutral peptide Mr(calc): 1651.77**

**Ions Score: 65**

**Matches (Bold Red): 8/112** fragment ions using 12 most intense peaks

MS/MS Fragmentation of **IGVVVGNCYGFVGNR**

Found in **Q9DBM2**, ECHP\_MOUSE Peroxisomal bifunctional enzyme

Variable modifications: **C8** : ICAT\_light

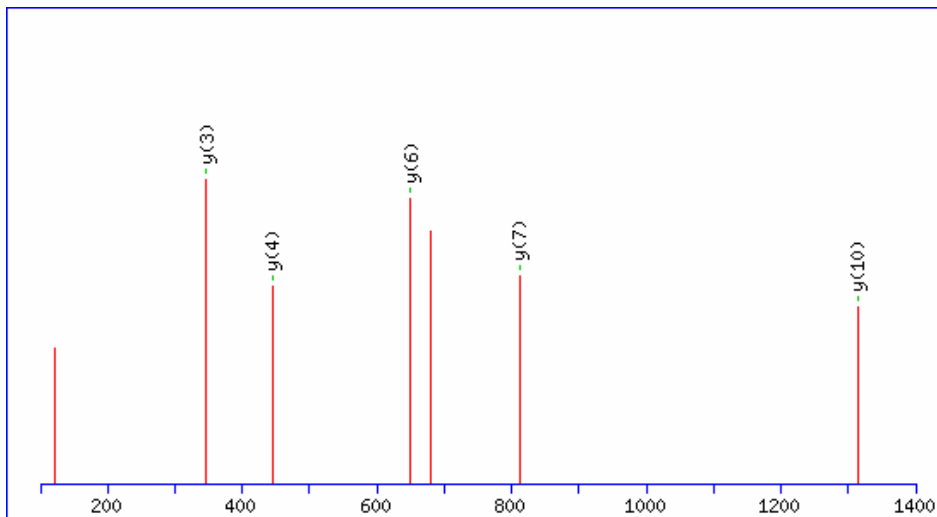

**Monoisotopic mass of neutral peptide Mr(calc): 1779.91**

**Ions Score: 41**

**Matches (Bold Red): 5/100** fragment ions using 7 most intense peaks

MS/MS Fragmentation of **IGVVVGNCYGFVGNR**

Found in **Q9DBM2**, ECHP\_MOUSE Peroxisomal bifunctional enzyme

Variable modifications: **C8** : ICAT\_heavy

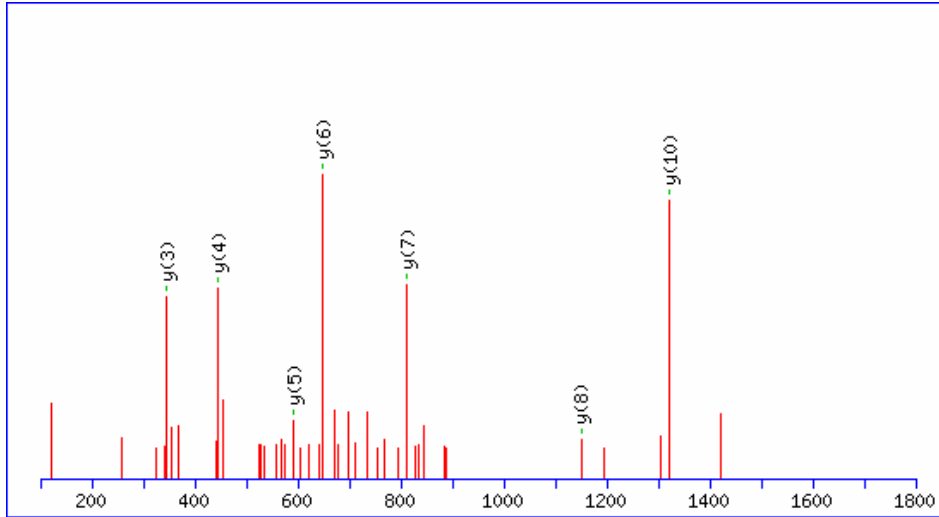

Monoisotopic mass of neutral peptide Mr(calc): 1788.94

Ions Score: 49

Matches (**Bold Red**): 7/100 fragment ions using 12 most intense peaks

MS/MS Fragmentation of **AIVICGANDNFCAGADIHGFK**

Found in **Q9DBM2**, ECHP\_MOUSE Peroxisomal bifunctional enzyme

Variable modifications: **C5** : ICAT\_light **C12** : ICAT\_light

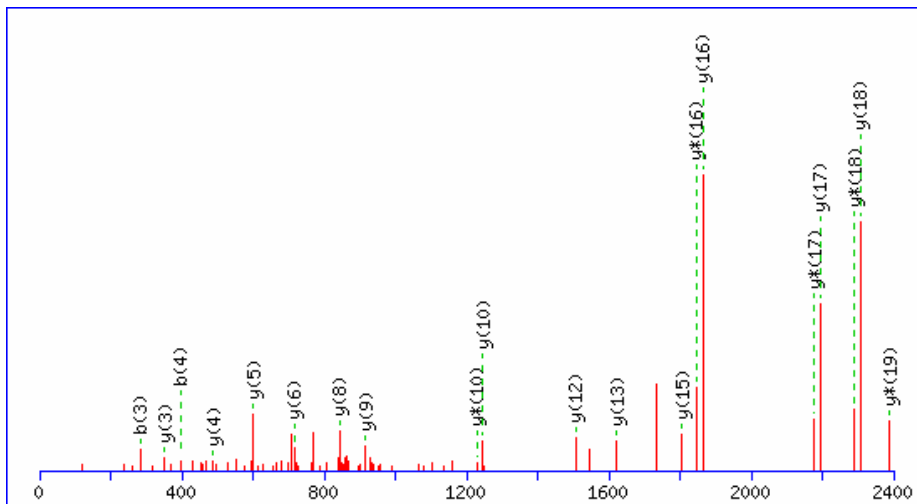

Monoisotopic mass of neutral peptide Mr(calc): 2589.25

Ions Score: 91

Matches (**Bold Red**): 21/200 fragment ions using 42 most intense peaks

MS/MS Fragmentation of **AIVICGANDNFCAGADIHGFK**  
Found in **Q9DBM2**, ECHP\_MOUSE Peroxisomal bifunctional enzyme

Variable modifications: **C5** : ICAT\_heavy **C12** : ICAT\_heavy

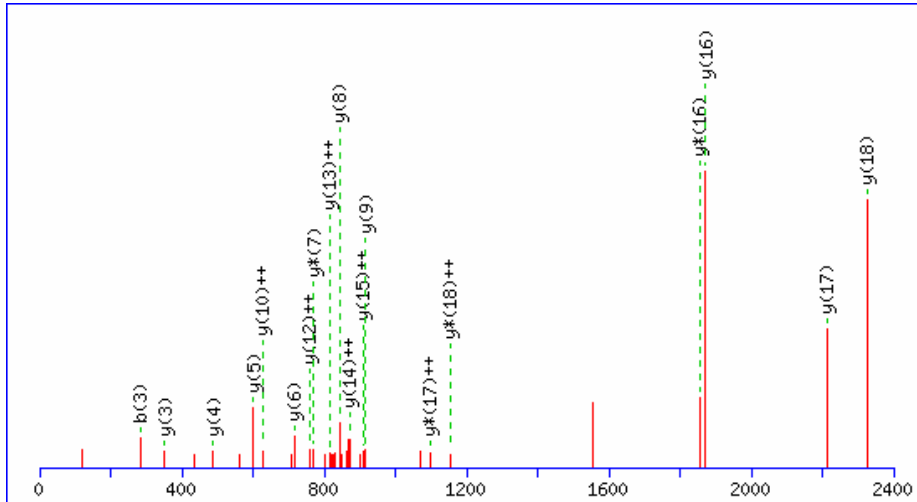

**Monoisotopic mass of neutral peptide Mr(calc): 2607.31**

**Ions Score: 60**

**Matches (Bold Red): 20/200** fragment ions using 42 most intense peaks

7 HMCS2\_MOUSE

MS/MS Fragmentation of **CYAAYR**  
Found in **P54869**, HMCS2\_MOUSE Hydroxymethylglutaryl-CoA synthase

Variable modifications: **C1** : ICAT\_light

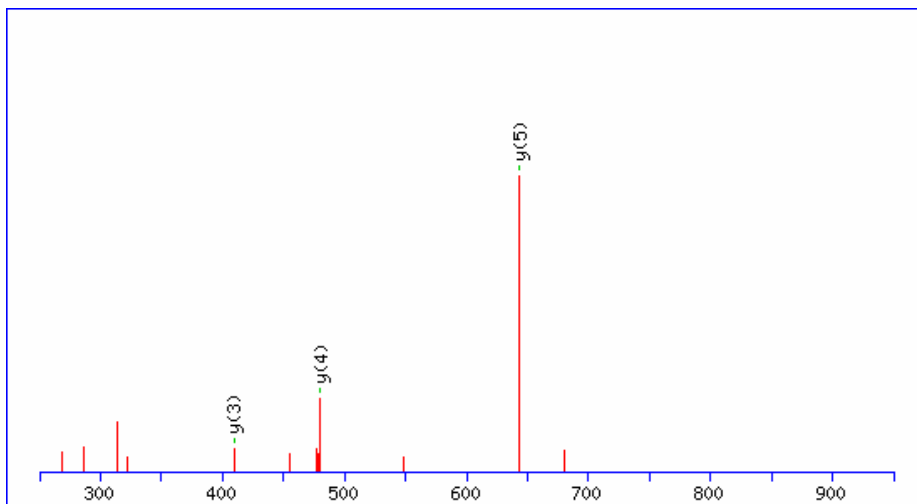

**Monoisotopic mass of neutral peptide Mr(calc): 972.45**

**Ions Score: 21**

**Matches (Bold Red): 3/30** fragment ions using 6 most intense peaks

MS/MS Fragmentation of **CYAAYR**

Found in **P54869**, HMCS2\_MOUSE Hydroxymethylglutaryl-CoA synthase

Variable modifications: C1 : ICAT\_heavy

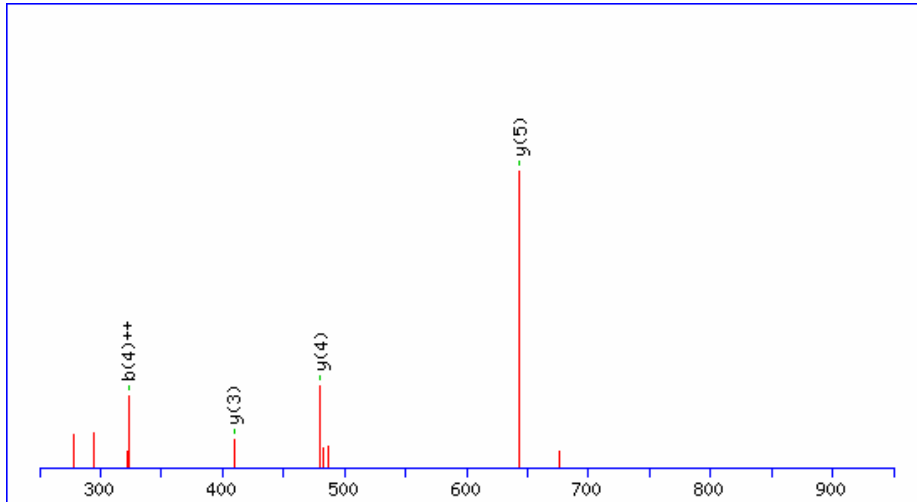

**Monoisotopic mass of neutral peptide Mr(calc):** 981.48

**Ions Score:** 29

**Matches (Bold Red):** 4/30 fragment ions using 4 most intense peaks

MS/MS Fragmentation of **LSIQCYLR**

Found in **P54869**, HMCS2\_MOUSE Hydroxymethylglutaryl-CoA synthase

Variable modifications: C5 : ICAT\_light

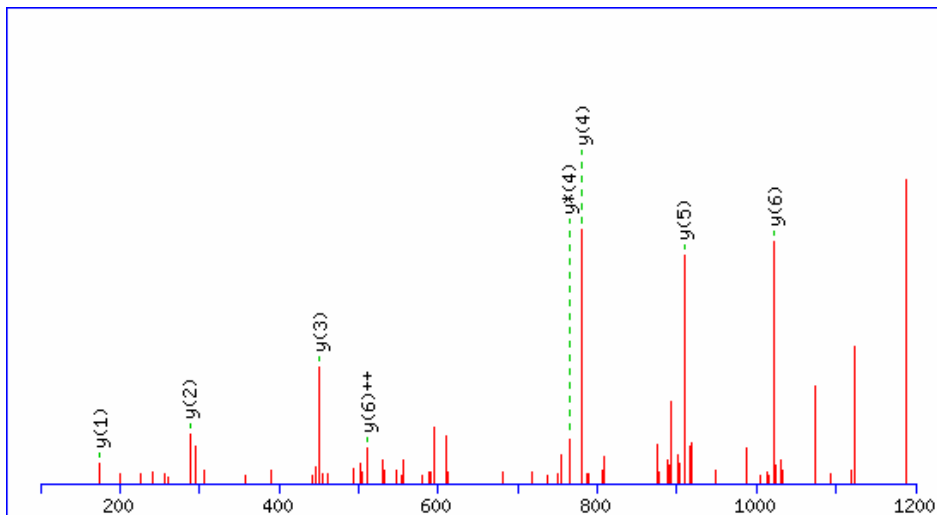

**Monoisotopic mass of neutral peptide Mr(calc):** 1221.65

**Ions Score:** 51

**Matches (Bold Red):** 8/64 fragment ions using 14 most intense peaks

MS/MS Fragmentation of **LSIQCYLR**

Found in **P54869**, HMCS2\_MOUSE Hydroxymethylglutaryl-CoA synthase

Variable modifications: **C5** : ICAT\_heavy

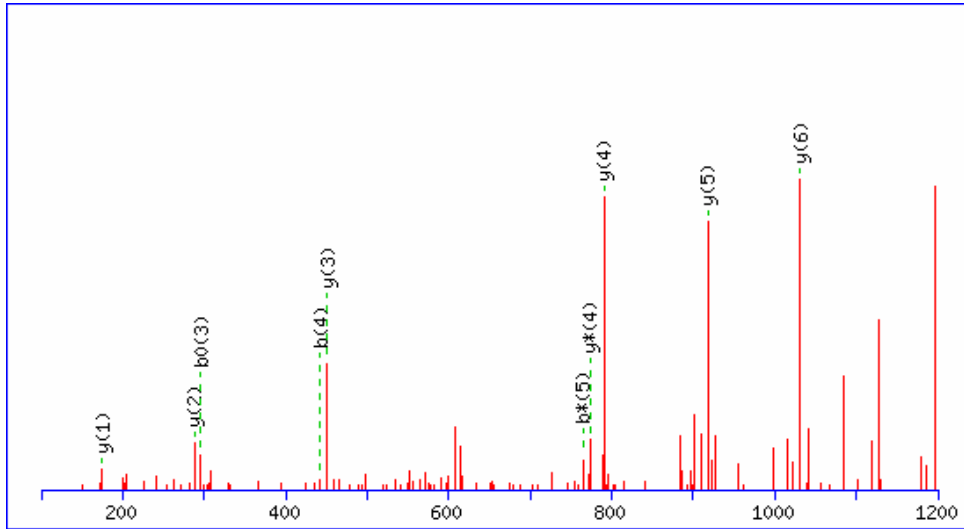

**Monoisotopic mass of neutral peptide Mr(calc): 1230.68**

**Ions Score: 51**

**Matches (Bold Red): 10/64** fragment ions using 22 most intense peaks

MS/MS Fragmentation of **QAGNNQPFTLDDVQYMIFHTPFCK**

Found in **P54869**, HMCS2\_MOUSE Hydroxymethylglutaryl-CoA synthase

Variable modifications: **C23** : ICAT\_light

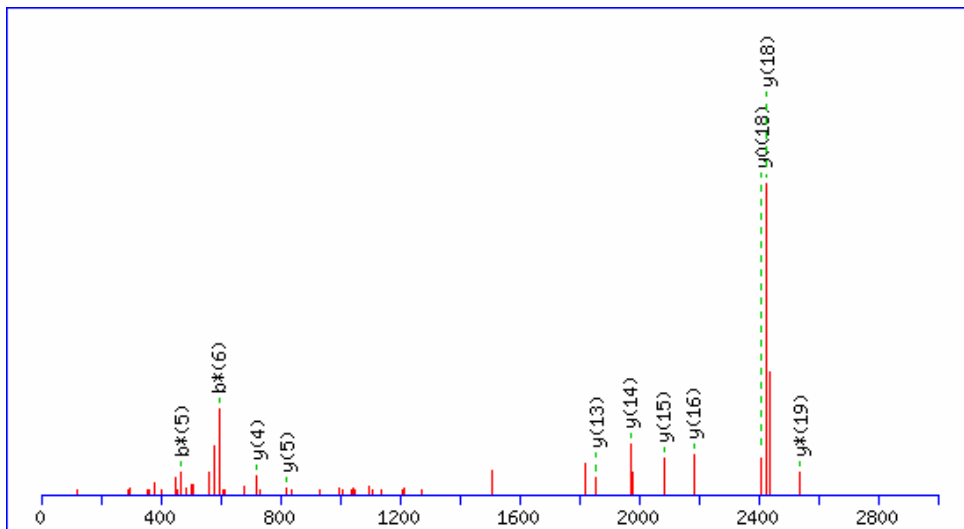

**Monoisotopic mass of neutral peptide Mr(calc): 3040.42**

**Ions Score: 29**

**Matches (Bold Red): 11/252** fragment ions using 29 most intense peaks

MS/MS Fragmentation of **QAGNNQPFTLDDVQYMIFHTPFCK**  
Found in **P54869**, HMCS2\_MOUSE Hydroxymethylglutaryl-CoA synthase

Variable modifications: **C23** : ICAT\_heavy

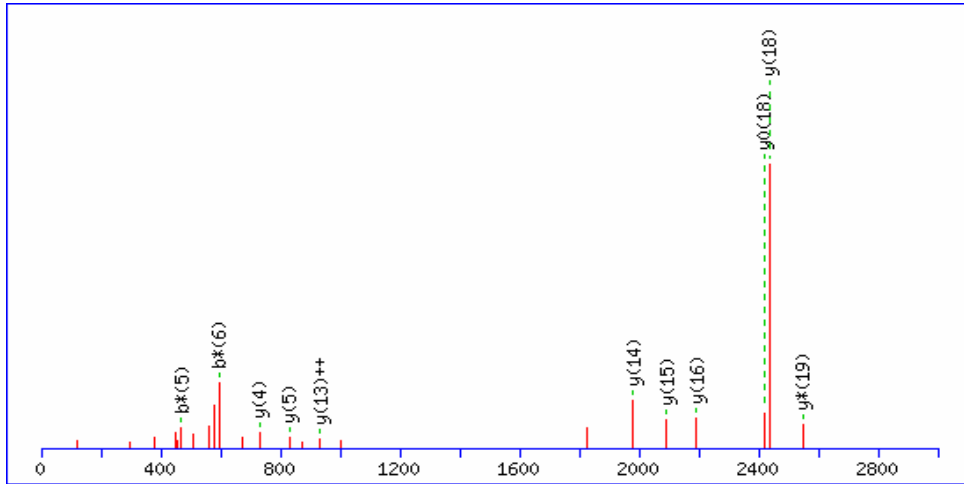

Monoisotopic mass of neutral peptide Mr(calc): 3049.45

Ions Score: 29

Matches (**Bold Red**): 11/252 fragment ions using 21 most intense peaks

8 NDUS1\_MOUSE

MS/MS Fragmentation of **HSFCEVLK**  
Found in **Q91VD9**, NDUS1\_MOUSE NADH-ubiquinone oxidoreductase 75 kDa subunit

Variable modifications: **C4** : ICAT\_heavy

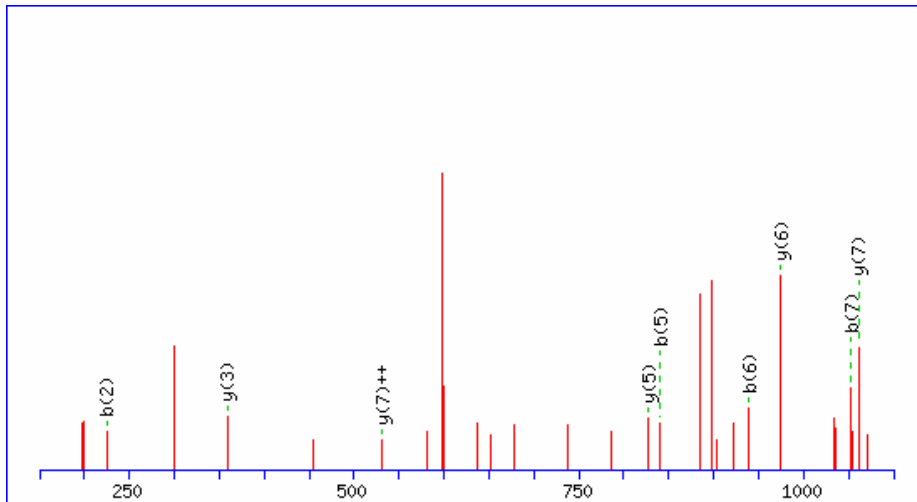

Monoisotopic mass of neutral peptide Mr(calc): 1197.63

Ions Score: 23

Matches (**Bold Red**): 9/62 fragment ions using 29 most intense peaks

MS/MS Fragmentation of **HSFCEVLK**

Found in **Q91VD9**, NDUS1\_MOUSE NADH-ubiquinone oxidoreductase 75 kDa subunit

Variable modifications: **C4** : ICAT\_light

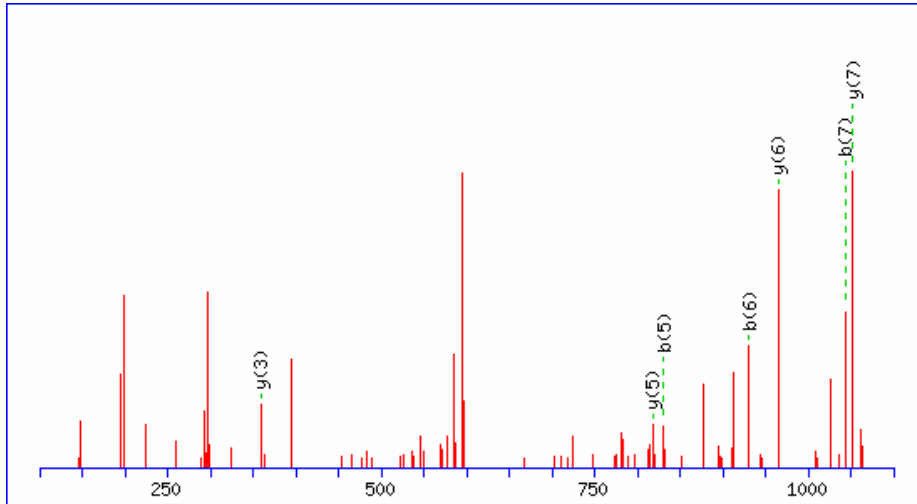

**Monoisotopic mass of neutral peptide Mr(calc):** 1188.60

**Ions Score:** 20

**Matches (Bold Red):** 7/62 fragment ions using 33 most intense peaks

9 NDUB7\_MOUSE

MS/MS Fragmentation of **DYCAHYLR**

Found in **Q9CR61**, NDUB7\_MOUSE NADH dehydrogenase [ubiquinone] 1 beta subcomplex subunit 7

Variable modifications: **C3** : ICAT\_light

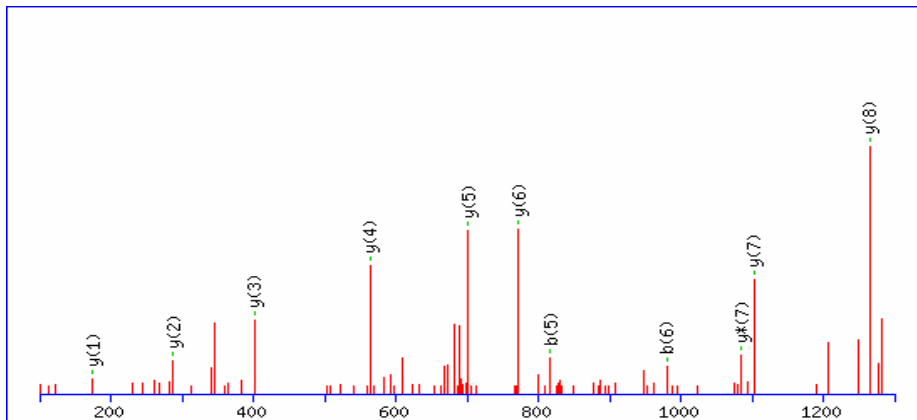

**Monoisotopic mass of neutral peptide Mr(calc):** 1379.67

**Ions Score:** 62

**Matches (Bold Red):** 11/64 fragment ions using 16 most intense peak



10 NDUV1\_MOUSE

MS/MS Fragmentation of **LKPPFPADVGVFGCPTTVANVETVAVSPTICR**

Found in **Q91YT0**, NDUV1\_MOUSE NADH dehydrogenase [ubiquinone] flavoprotein 1

Variable modifications: C14 : ICAT\_light C31 : ICAT\_light

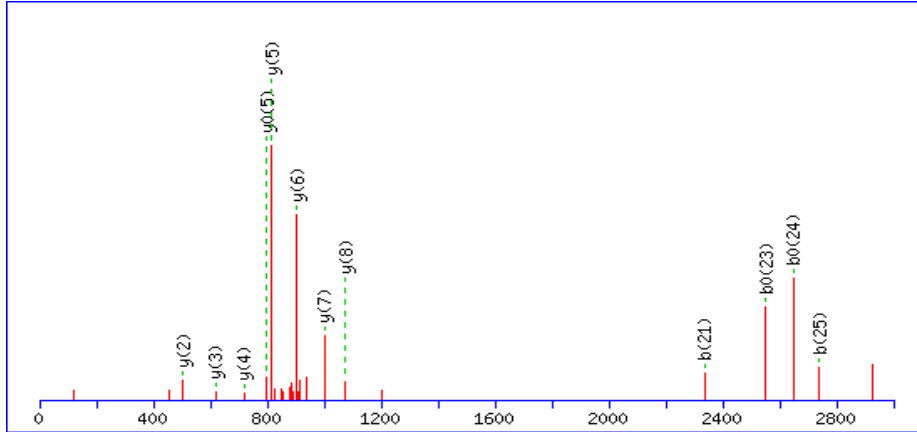

Monoisotopic mass of neutral peptide Mr(calc): 3738.95

Ions Score: 46

Matches (**Bold Red**): 12/350 fragment ions using 18 most intense peaks

MS/MS Fragmentation of **LKPPFPADVGVFGCPTTVANVETVAVSPTICR**

Found in **Q91YT0**, NDUV1\_MOUSE NADH dehydrogenase [ubiquinone] flavoprotein 1

Variable modifications: C14 : ICAT\_heavy C31 : ICAT\_heavy

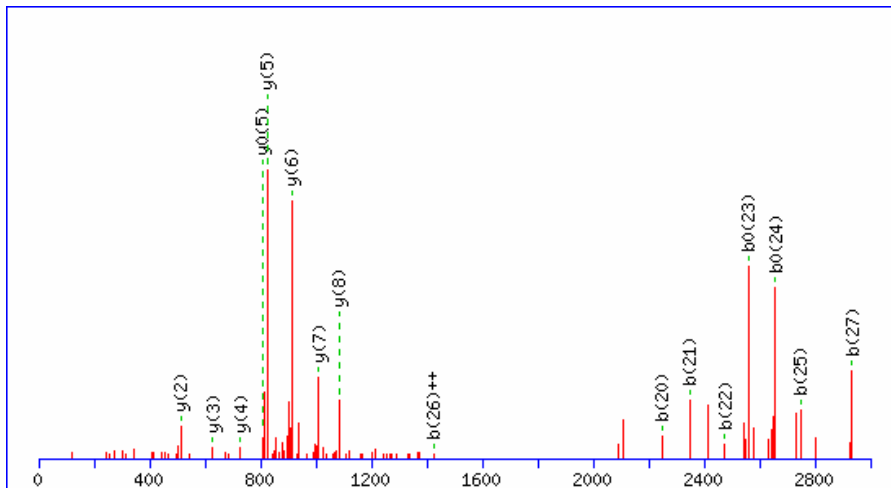

Monoisotopic mass of neutral peptide Mr(calc): 3757.01

Ions Score: 27

Matches (**Bold Red**): 16/350 fragment ions using 33 most intense peak

11 BHMT1\_MOUSE

MS/MS Fragmentation of **VNEAACDIAR**

Found in **O35490**, BHMT1\_MOUSE Betaine--homocysteine S-methyltransferase 1

Variable modifications: C6 : ICAT\_light

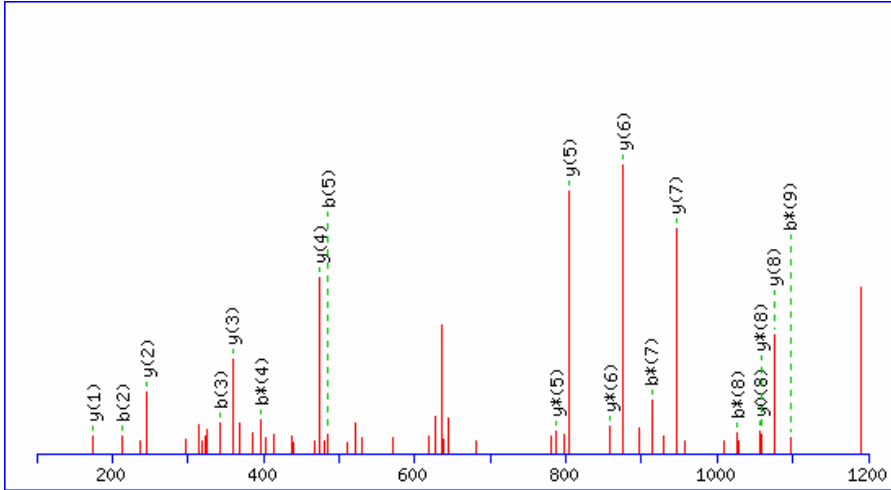

Monoisotopic mass of neutral peptide Mr(calc): 1287.62

Ions Score: 64

Matches (**Bold Red**): 19/96 fragment ions using 32 most intense peaks

MS/MS Fragmentation of **VNEAACDIAR**

Found in **O35490**, BHMT1\_MOUSE Betaine--homocysteine S-methyltransferase 1

Variable modifications: C6 : ICAT\_heavy

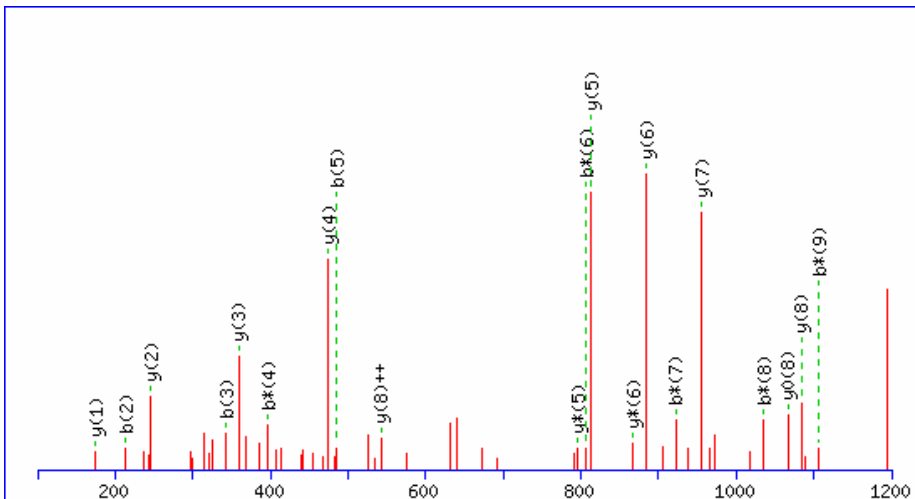

Monoisotopic mass of neutral peptide Mr(calc): 1296.65

Ions Score: 61

Matches (**Bold Red**): 20/96 fragment ions using 39 most intense peaks

MS/MS Fragmentation of **YIGGCCGFEPYHIR**

Found in **O35490**, BHMT1\_MOUSE Betaine--homocysteine S-methyltransferase 1

Variable modifications: C5 : ICAT\_light C6 : ICAT\_light

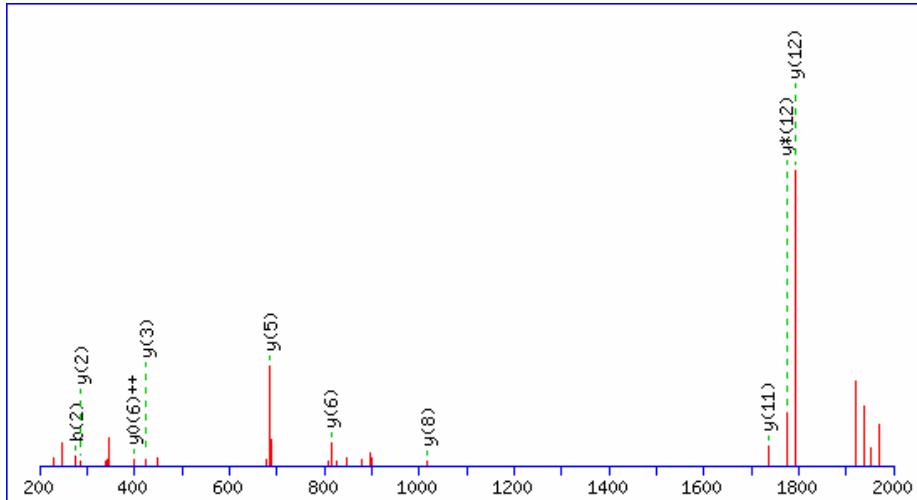

Monoisotopic mass of neutral peptide Mr(calc): 2067.97

Ions Score: 21

Matches (**Bold Red**): 10/104 fragment ions using 37 most intense peaks

MS/MS Fragmentation of **YIGGCCGFEPYHIR**

Found in **O35490**, BHMT1\_MOUSE Betaine--homocysteine S-methyltransferase 1

Variable modifications: C5 : ICAT\_heavy C6 : ICAT\_heavy

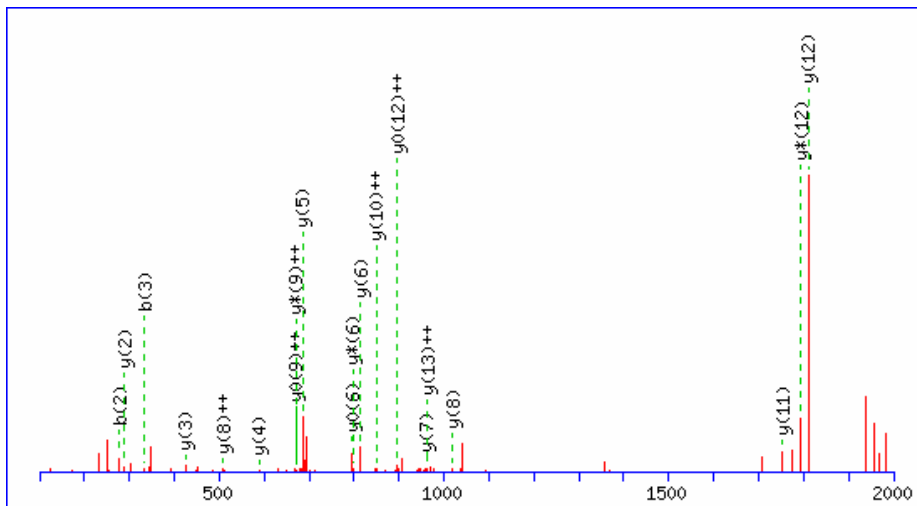

Monoisotopic mass of neutral peptide Mr(calc): 2086.03

Ions Score: 27

Matches (**Bold Red**): 20/104 fragment ions using 76 most intense peaks

MS/MS Fragmentation of **AGASIVGVNCHFDPVSLQTVK**  
Found in **O35490**, BHMT1\_MOUSE Betaine--homocysteine S-methyltransferase

Variable modifications: **C10** : ICAT\_light

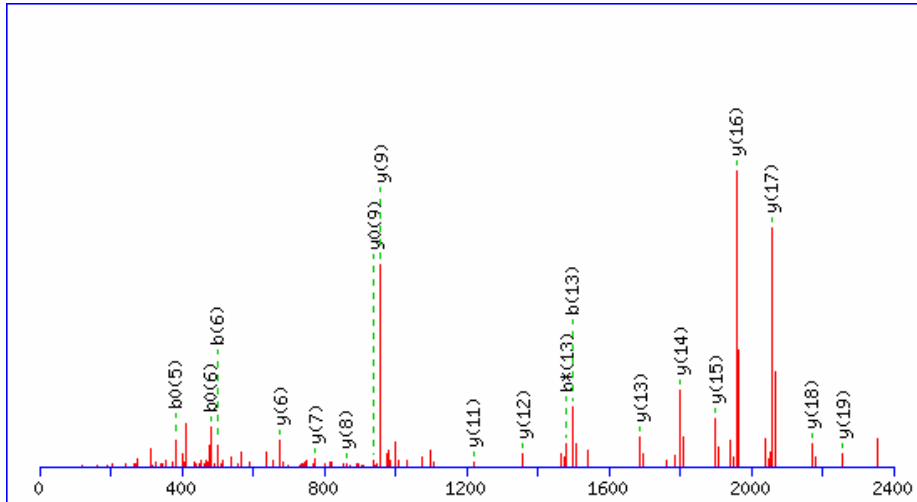

Monoisotopic mass of neutral peptide Mr(calc): 2455.25

Ions Score: 104

Matches (**Bold Red**): 19/226 fragment ions using 41 most intense peaks

MS/MS Fragmentation of **AGASIVGVNCHFDPVSLQTVK**  
Found in **O35490**, BHMT1\_MOUSE Betaine--homocysteine S-methyltransferase 1

Variable modifications: **C10** : ICAT\_heavy

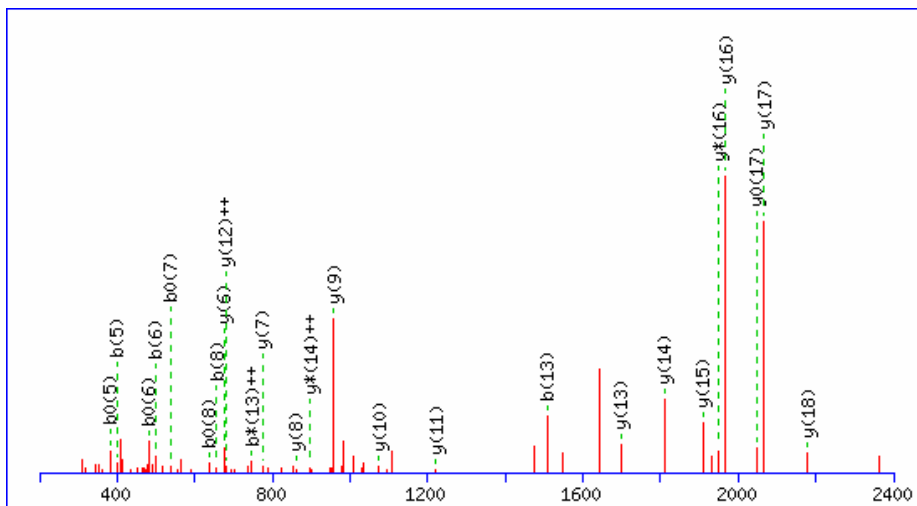

Monoisotopic mass of neutral peptide Mr(calc): 2464.28

Ions Score: 67

Matches (**Bold Red**): 25/226 fragment ions using 53 most intense peaks

MS/MS Fragmentation of **ASGKPVAATMCIGPEGDLHGVPPEGCAVR**  
Found in **O35490**, BHMT1\_MOUSE Betaine--homocysteine S-methyltransferase 1

Variable modifications: C11 : ICAT\_light C26 : ICAT\_light

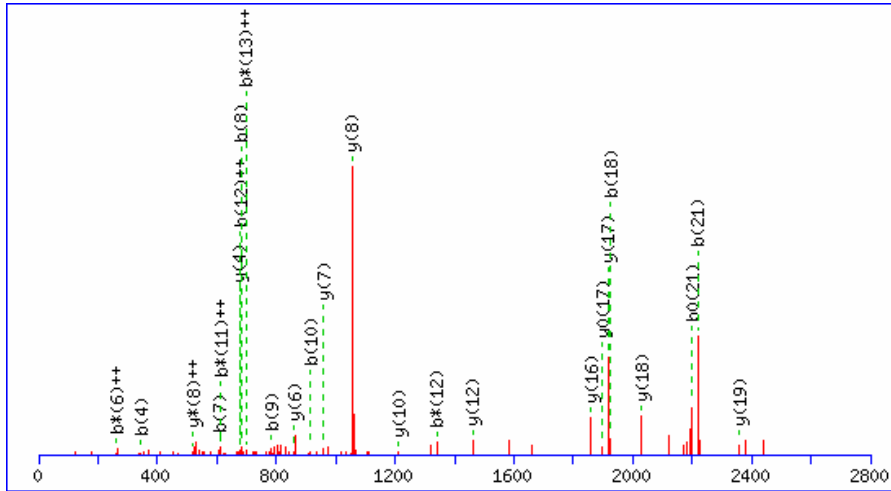

Monoisotopic mass of neutral peptide Mr(calc): 3272.61

Ions Score: 41

Matches (**Bold Red**): 25/320 fragment ions using 64 most intense peaks

MS/MS Fragmentation of **ASGKPVAATMCIGPEGDLHGVPPEGCAVR**  
Found in **O35490**, BHMT1\_MOUSE Betaine--homocysteine S-methyltransferase

Variable modifications: C11 : ICAT\_heavy C26 : ICAT\_heavy

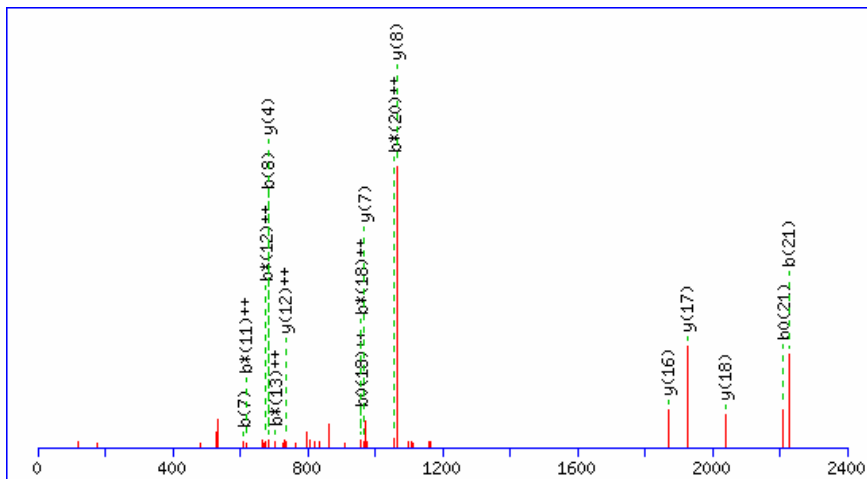

Monoisotopic mass of neutral peptide Mr(calc): 3290.67

Ions Score: 16

Matches (**Bold Red**): 17/320 fragment ions using 42 most intense peaks

12 CAH3\_MOUSE

MS/MS Fragmentation of **EAPFTHFDPSCLFPACR**  
Found in **P16015**, CAH3\_MOUSE Carbonic anhydrase 3

Variable modifications: **C11** : ICAT\_light **C16** : ICAT\_light

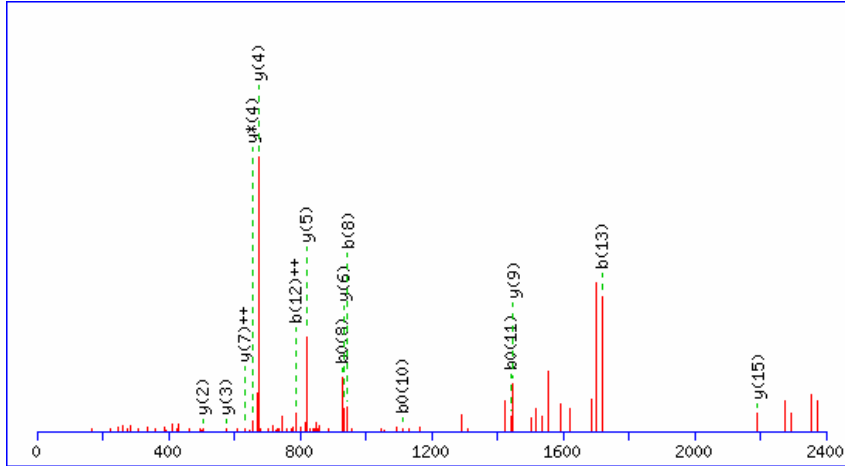

Monoisotopic mass of neutral peptide Mr(calc): 2391.11

Ions Score: 19

Matches (**Bold Red**): 15/146 fragment ions using 51 most intense peaks

MS/MS Fragmentation of **EAPFTHFDPSCLFPACR**  
Found in **P16015**, CAH3\_MOUSE Carbonic anhydrase 3

Variable modifications: **C11** : ICAT\_heavy **C16** : ICAT\_heavy

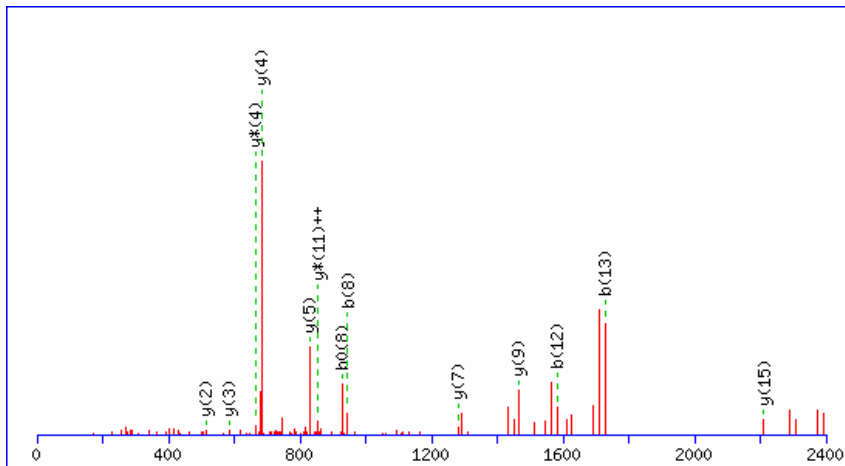

Monoisotopic mass of neutral peptide Mr(calc): 2409.17

Ions Score: 26

Matches (**Bold Red**): 13/146 fragment ions using 39 most intense peaks

13 HYPE\_MOUSE

MS/MS Fragmentation of **ESGYLHIQATKPDTVGCALNDSPVGLAAAYILEK**  
Found in **Q9D379**, HYPE\_MOUSE Epoxide hydrolase 1

Variable modifications: C17 : ICAT\_light

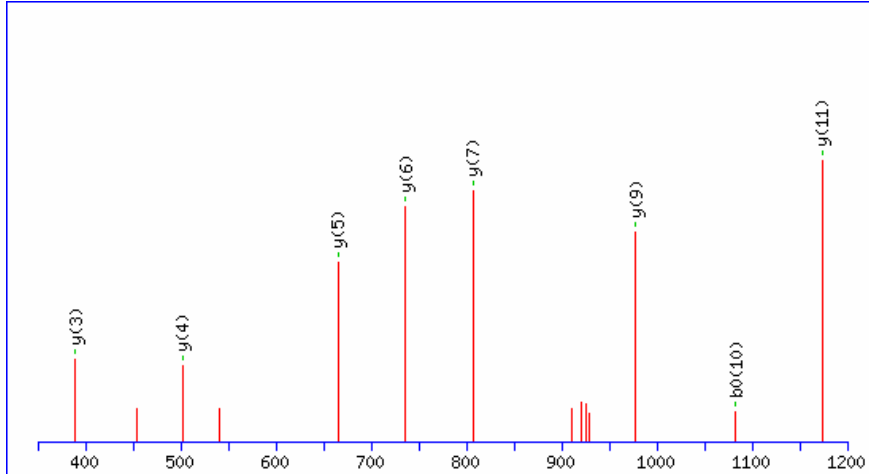

**Monoisotopic mass of neutral peptide Mr(calc):** 3699.88

**Ions Score:** 54

**Matches (Bold Red):** 8/368 fragment ions using 8 most intense peaks

MS/MS Fragmentation of **ESGYLHIQATKPDTVGCALNDSPVGLAAAYILEK**  
Found in **Q9D379**, HYPE\_MOUSE Epoxide hydrolase 1

Variable modifications: C17 : ICAT\_heavy

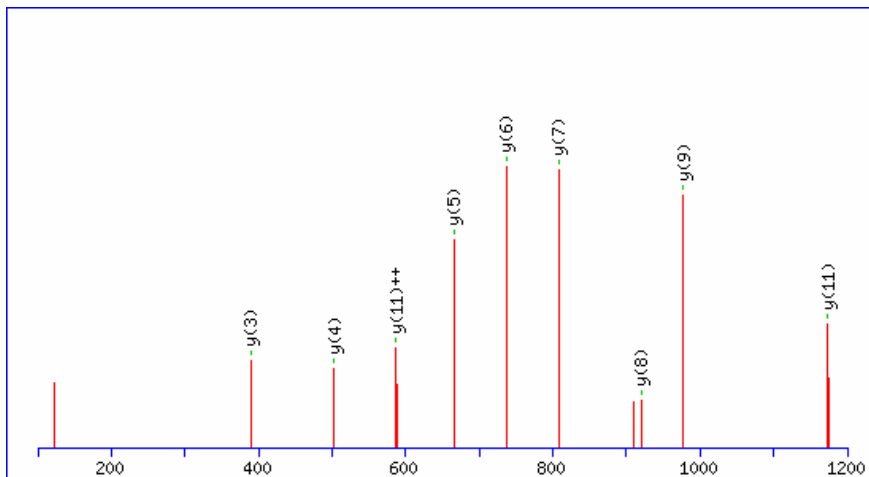

**Monoisotopic mass of neutral peptide Mr(calc):** 3708.91

**Ions Score:** 53

**Matches (Bold Red):** 9/368 fragment ions using 10 most intense peaks
