# Supplementary material
Source: PubMed Central journal article supplement (PMC2556018)
Supplement: M800109-MCP200_3.pdf [file M800109-MCP200_3.pdf]

Supplemental Fig. S3

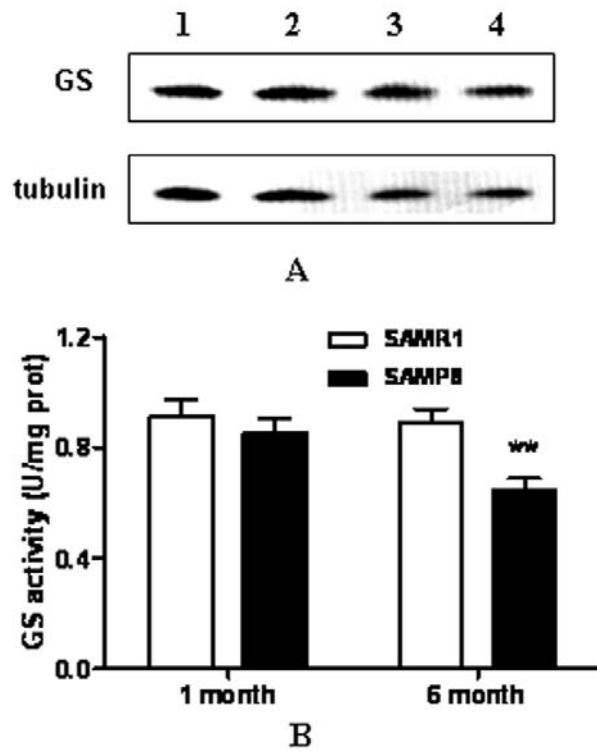

Assays of glutamine synthetase in SAMR1 and SAMP8 brains. (A) Western blotting analysis of glutamine synthetase. 1, 2, 3 and 4 represent brain homogenates from SAMR1-1m, SAMP8-1m, SAMR1-6m, and SAMP8-6m, respectively. (B) Activity of glutamine synthetase (GS) in brain homogenates. Error bars indicate SEM from five independent experiments; \*\*,  $p < 0.01$ .
